# Supplementary material for: Dispersion-free inertial focusing (DIF) for high-yield polydisperse micro-particle filtration and analysis
Source: Royal Society of Chemistry journal article supplement (doi:10.1039/d4lc00275j), 2024-01-01
Supplement: d4lc00275j1.pdf [file d4lc00275j1.pdf]

Supplementary information

1 **Dispersion-free inertial focusing (DIF)**  
2 **for high-yield polydisperse micro-particles filtration and analysis**

3 *Kelvin C. M. Lee<sup>1,2</sup>, Bob M. F. Chung<sup>1,2</sup>, Dickson M. D. Siu,<sup>1,2</sup> Sam C. K. Ho<sup>1,2</sup>, Daniel K. H. Ng<sup>1</sup>,*

4 *Kevin K. Tsia<sup>1,2\*</sup>*

5 1. *The University of Hong Kong, Pokfulam road, Hong Kong, HKSAR*

6 2. *Advanced Biomedical Instrumentation Centre, Hong Kong Science Park, Shatin, New Territories, Hong Kong*

7 \* *Corresponding author, e-mail: [tsia@hku.hk](mailto:tsia@hku.hk)*

8 **Table of content**

- 9 Figure S1. Inertial force field of a HAR rectangular channel by DNS  
10 Figure S2. Simulation result of secondary flows induced by a HAR symmetric orifice.  
11 Figure S3. Simulation result of secondary flows induced by a HAR half arc.  
12 Figure S4. Simulation result of secondary flows induced by a LAR symmetric orifice.  
13 Figure S5. Simulation result of secondary flows induced by a HAR alternating orifice.  
14 Figure S6. Projected view of particle flow trajectories aquired using a confocal microscope.  
15 Figure S7. Dispersion of single-plane focusing by DIF (Top) and standard IF (Bottom).  
16 Figure S8. Design of the DIF filter.  
17 Figure S9. Flow cytometry result of monodisperse sample from the input port.  
18 Figure S10. Flow cytometry result of monodisperse sample from the enrichment port.  
19 Figure S11. Flow cytometry result of monodisperse sample from the depletion port.  
20 Figure S12. Flow cytometry result of polydisperse sample from the input port.  
21 Figure S13. Flow cytometry result of polydisperse sample from the enrichment port.  
22 Figure S14. Flow cytometry result of polydisperse sample from the depletion port.  
23 Figure S15. Effect of varying axial (z-) position and numerical aperture (NA) on images.  
24 Figure S16. 20X phase-contrasted microscopic images of 4 cancer cell lines.  
25 Figure S17. Correlation analysis of 41 imaging features.  
26 Figure S18. Correlation analysis of 86 imaging features.  
27 Figure S19. Method to classify focusing condition of microparticles  
28 Table S1: Ratio of residual zone (equivalently loss) of the HAR rectangular pipe at various  
29 particle sizes and flow rates (by direct numerical simulation).  
30 Table S2: Loss of the single-plane DIF system (100%-yield) at various particle sizes and flow  
31 rates (by experiment).  
32 Table S3: Loss of the HAR rectangular pipe (100%-yield) at various particle sizes and flow  
33 rates (by experiment).  
34 Table S4: Area under curve (AUC) of the receiver-operating-characteristic (ROC) curve  
35 analysis between 5 types of cells.  
36 Table S5: Equations and variable to characterise dispersion  
37 Table S6: Equations of single-cell features  
38 Table S7: Variables and abbreviations of single-cell features  
39 Video S1: Evolution of cross-section particle distribution in HAR rectangular channel  
40 Video S2: Evolution of cross-section particle distribution in HAR symmetric orifice channel

### Supplementary information

- 41 Video S3: Evolution of cross-section particle distribution in DIF system (HAR symmetric
- 42 orifice channel then HAR rectangular channel)
- 43 Video S4: Evolution of cross-section particle distribution in reversed DIF system (HAR
- 44 rectangular channel then HAR symmetric orifice channel)

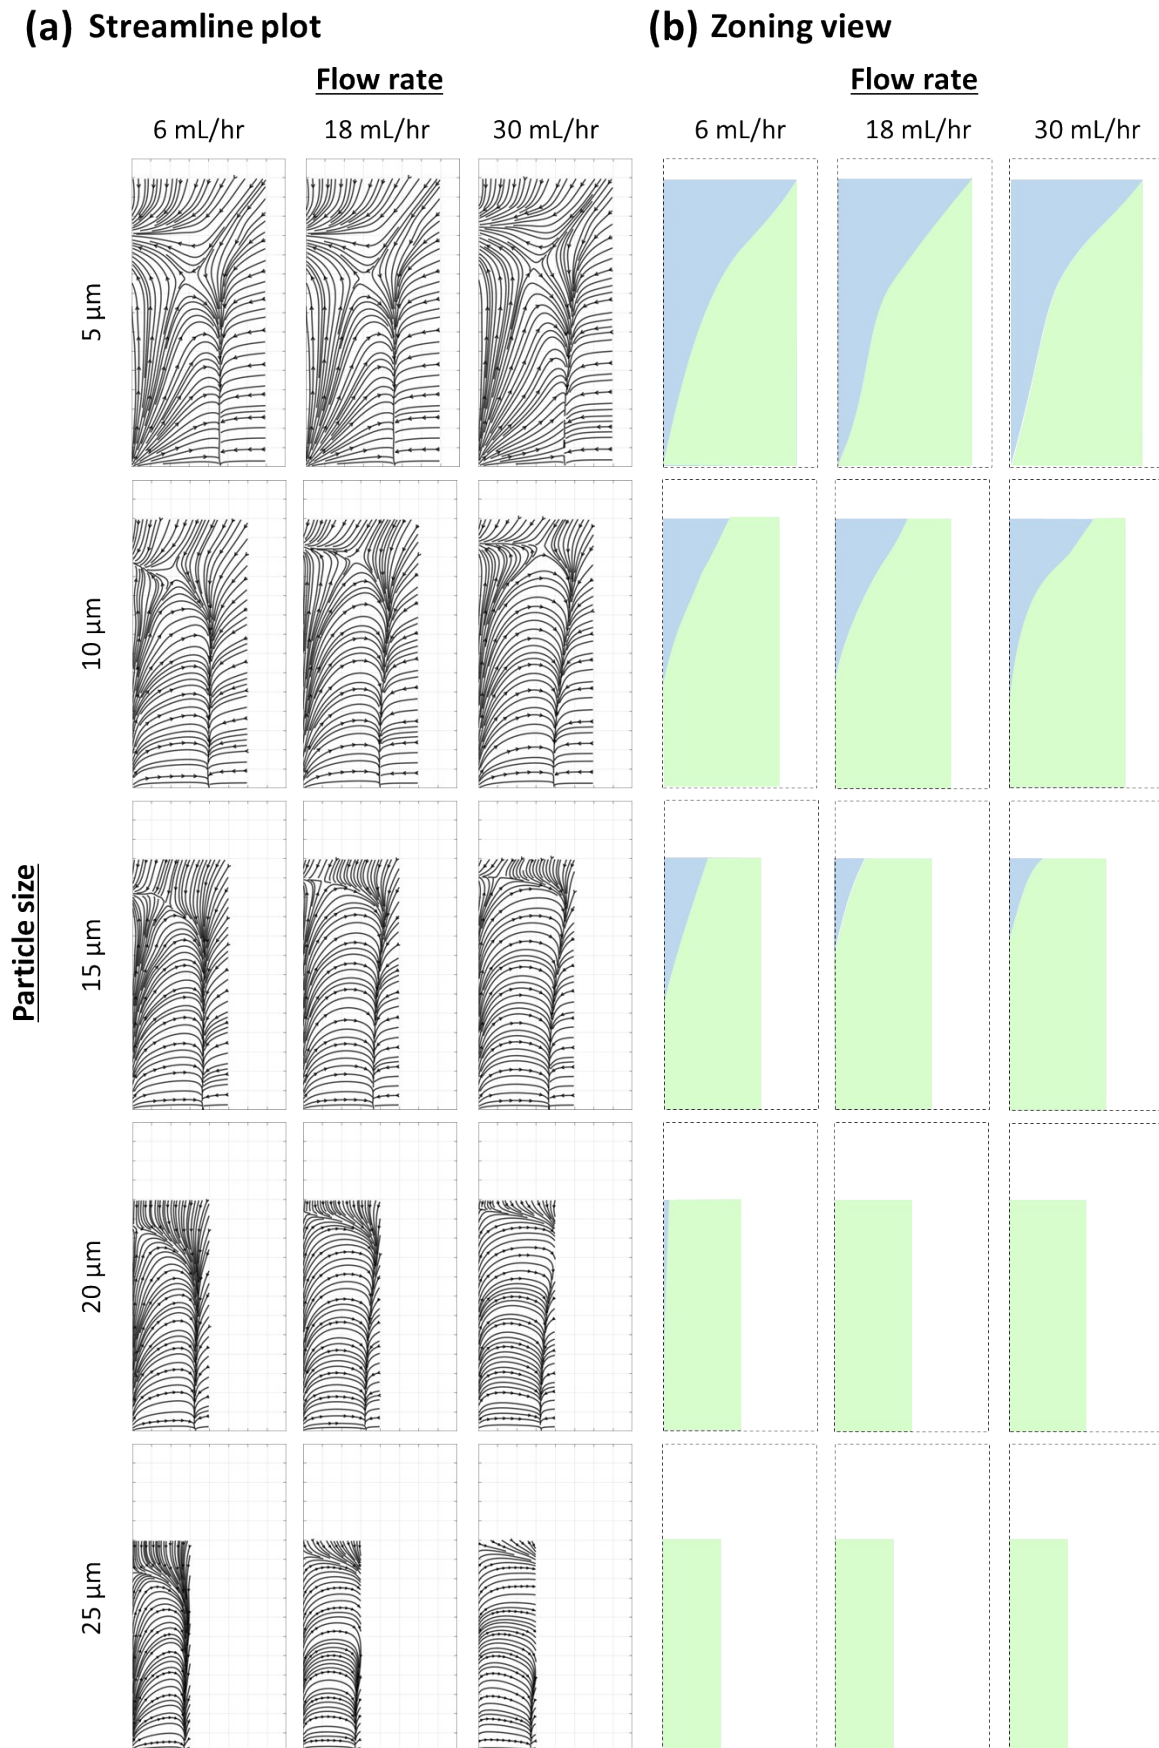

45

46 **Figure S1. Inertial force field of a HAR rectangular channel by DNS.** (a) Streamline plot  
 47 of force field at various conditions. (b) The corresponding zoning view.

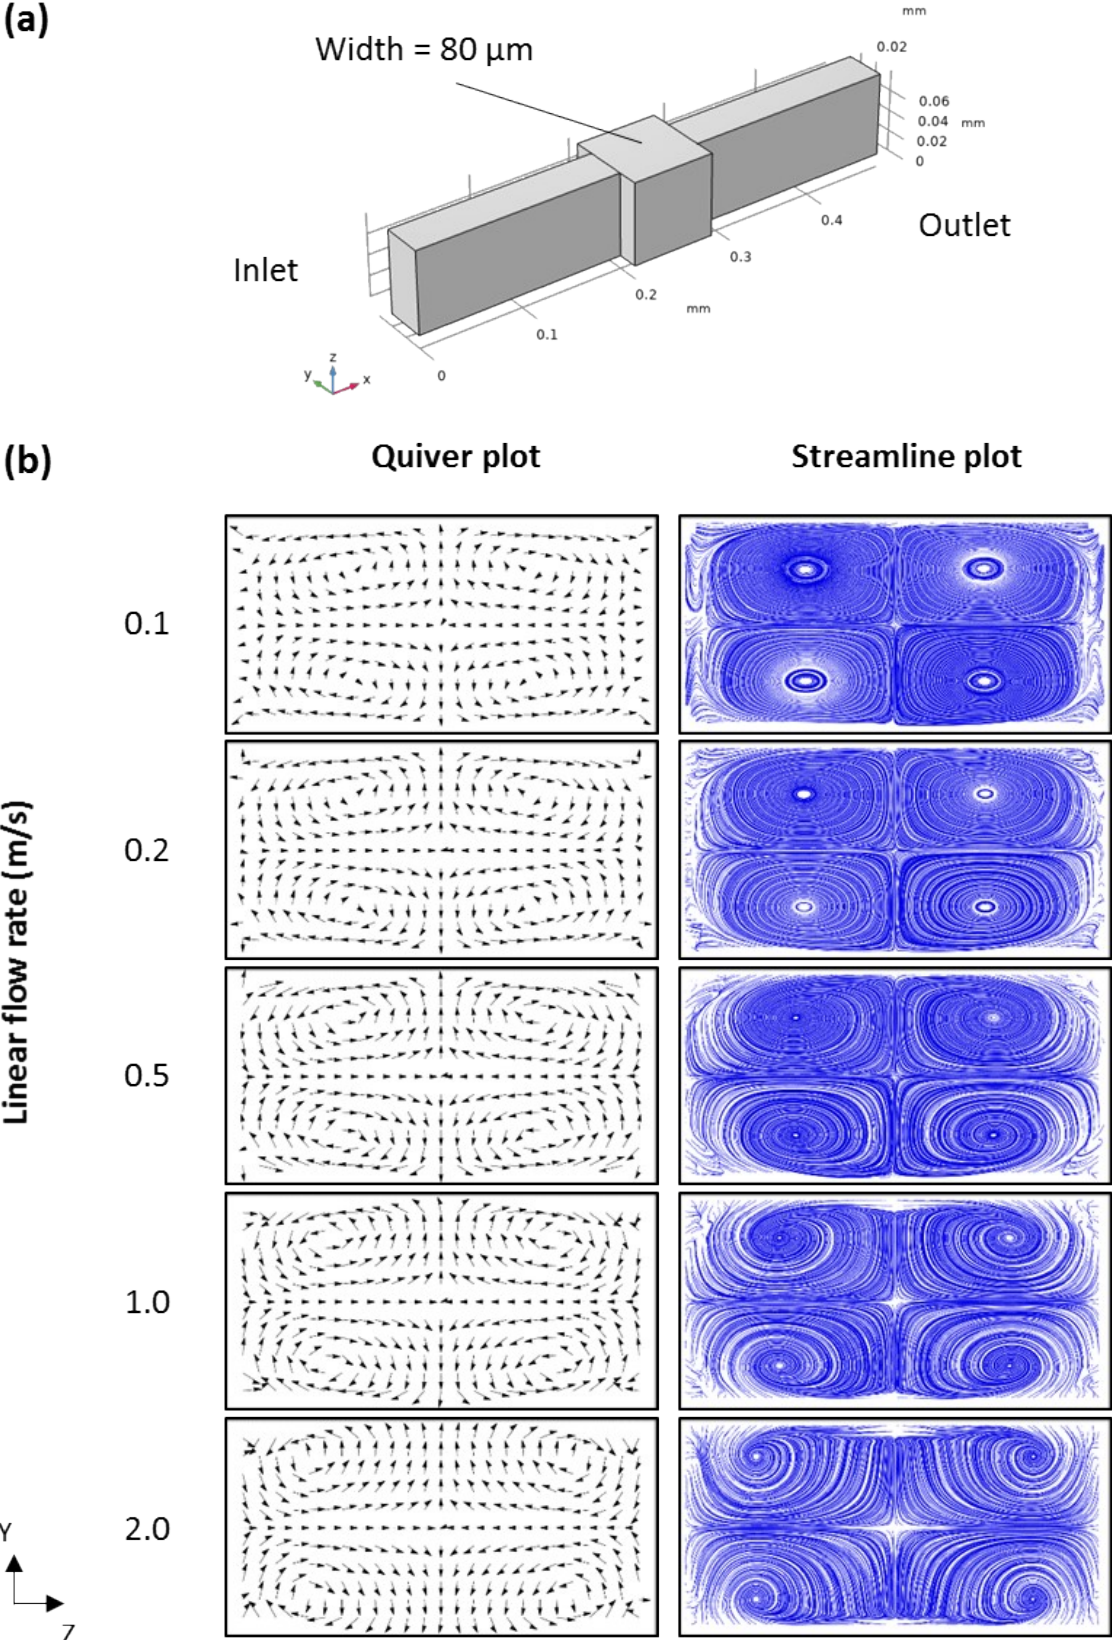

48  
49 **Figure S2. Simulation result of secondary flows induced by a HAR symmetric orifice. (a)**  
50 **CFD Model. (b) Quiver and streamline plots of the secondary flow.**  
51

(a)

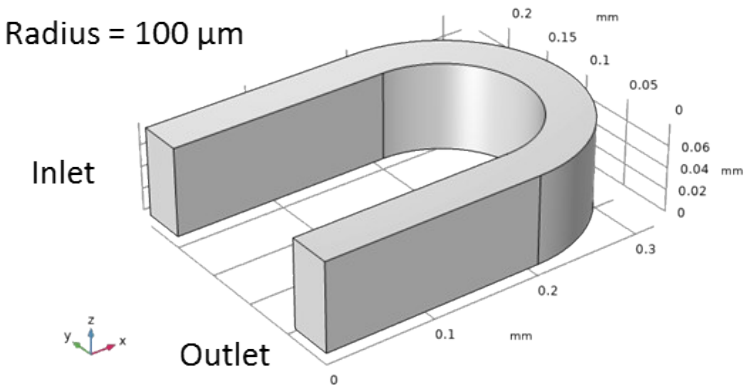

(b)

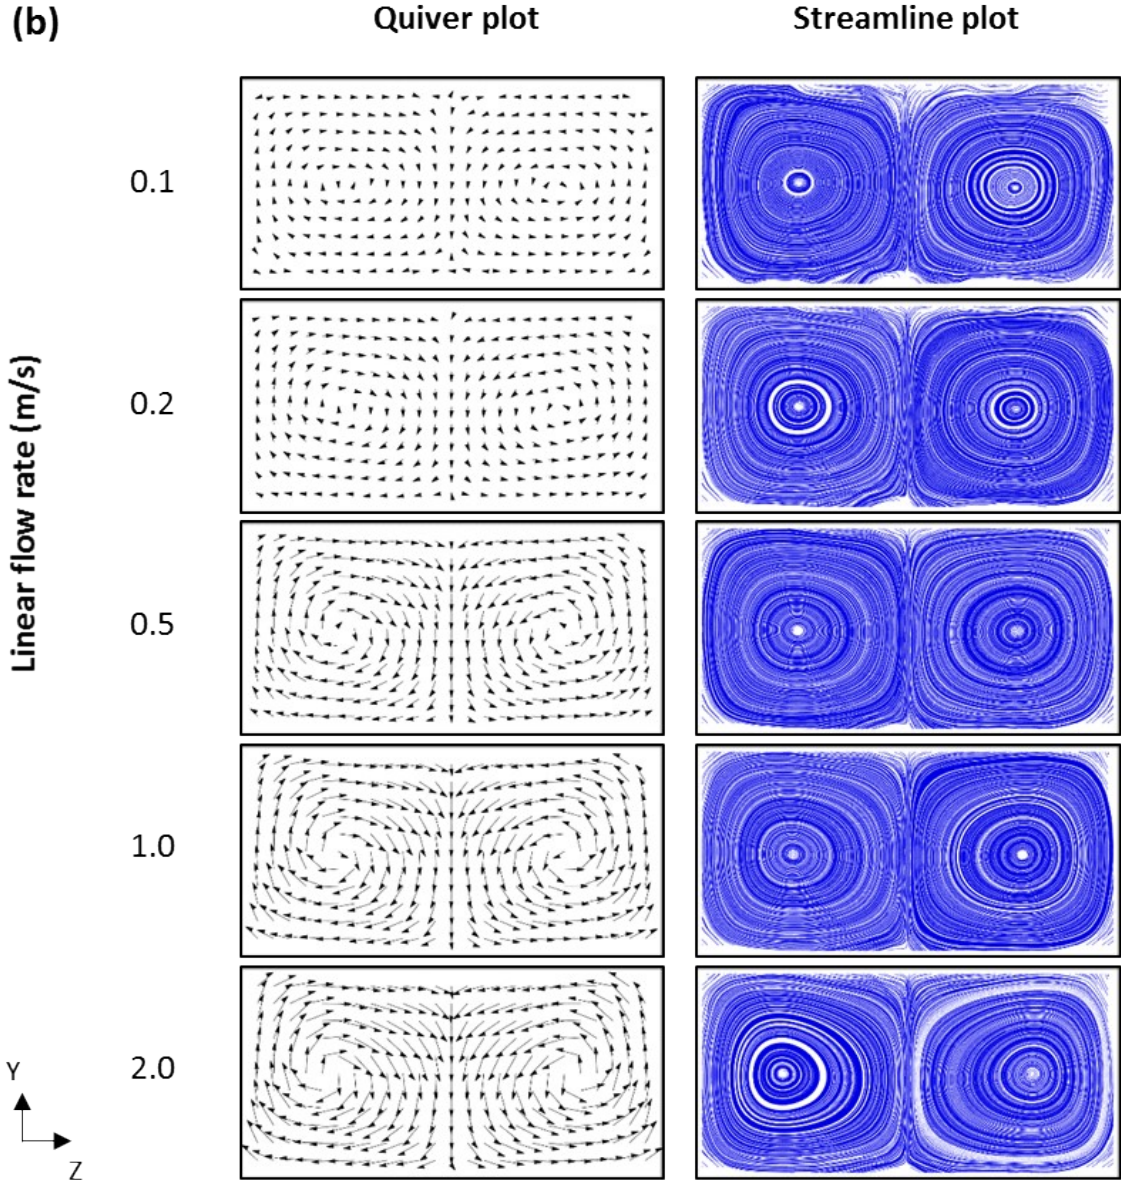

52

53 **Figure S3. Simulation result of secondary flows induced by a HAR half arc.** (a) CFD  
54 Model. (b) Quiver and streamline plots of the secondary flow.

55

56

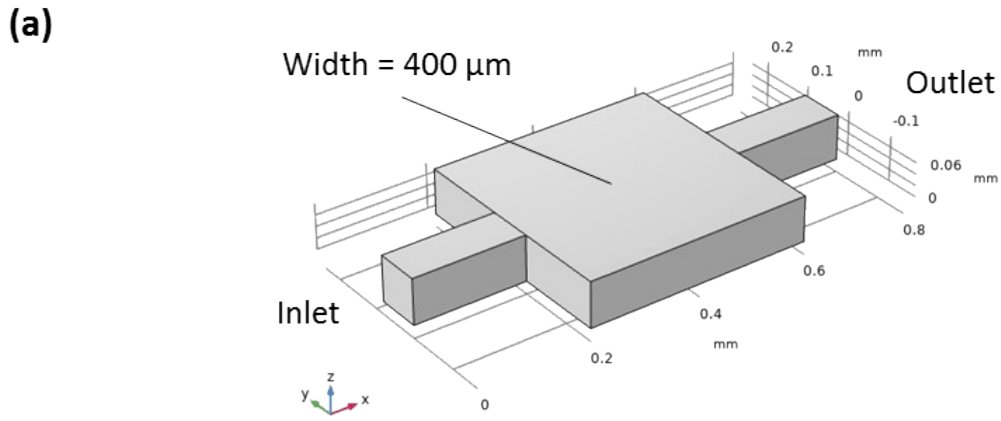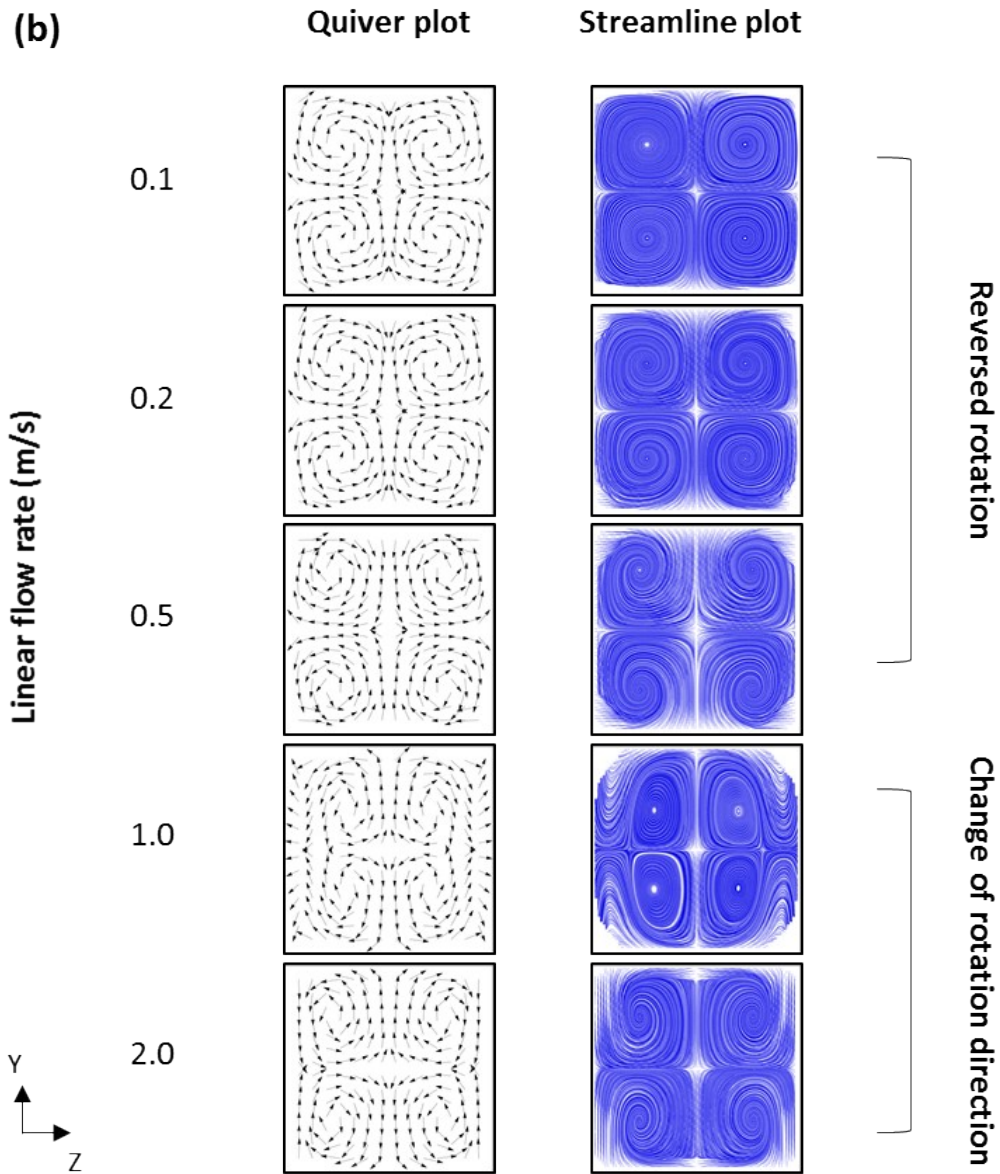

57

58 **Figure S4. Simulation result of secondary flows induced by a LAR symmetric orifice. (a)**

59 CFD Model. (b) Quiver and streamline plots of the secondary flow.

60

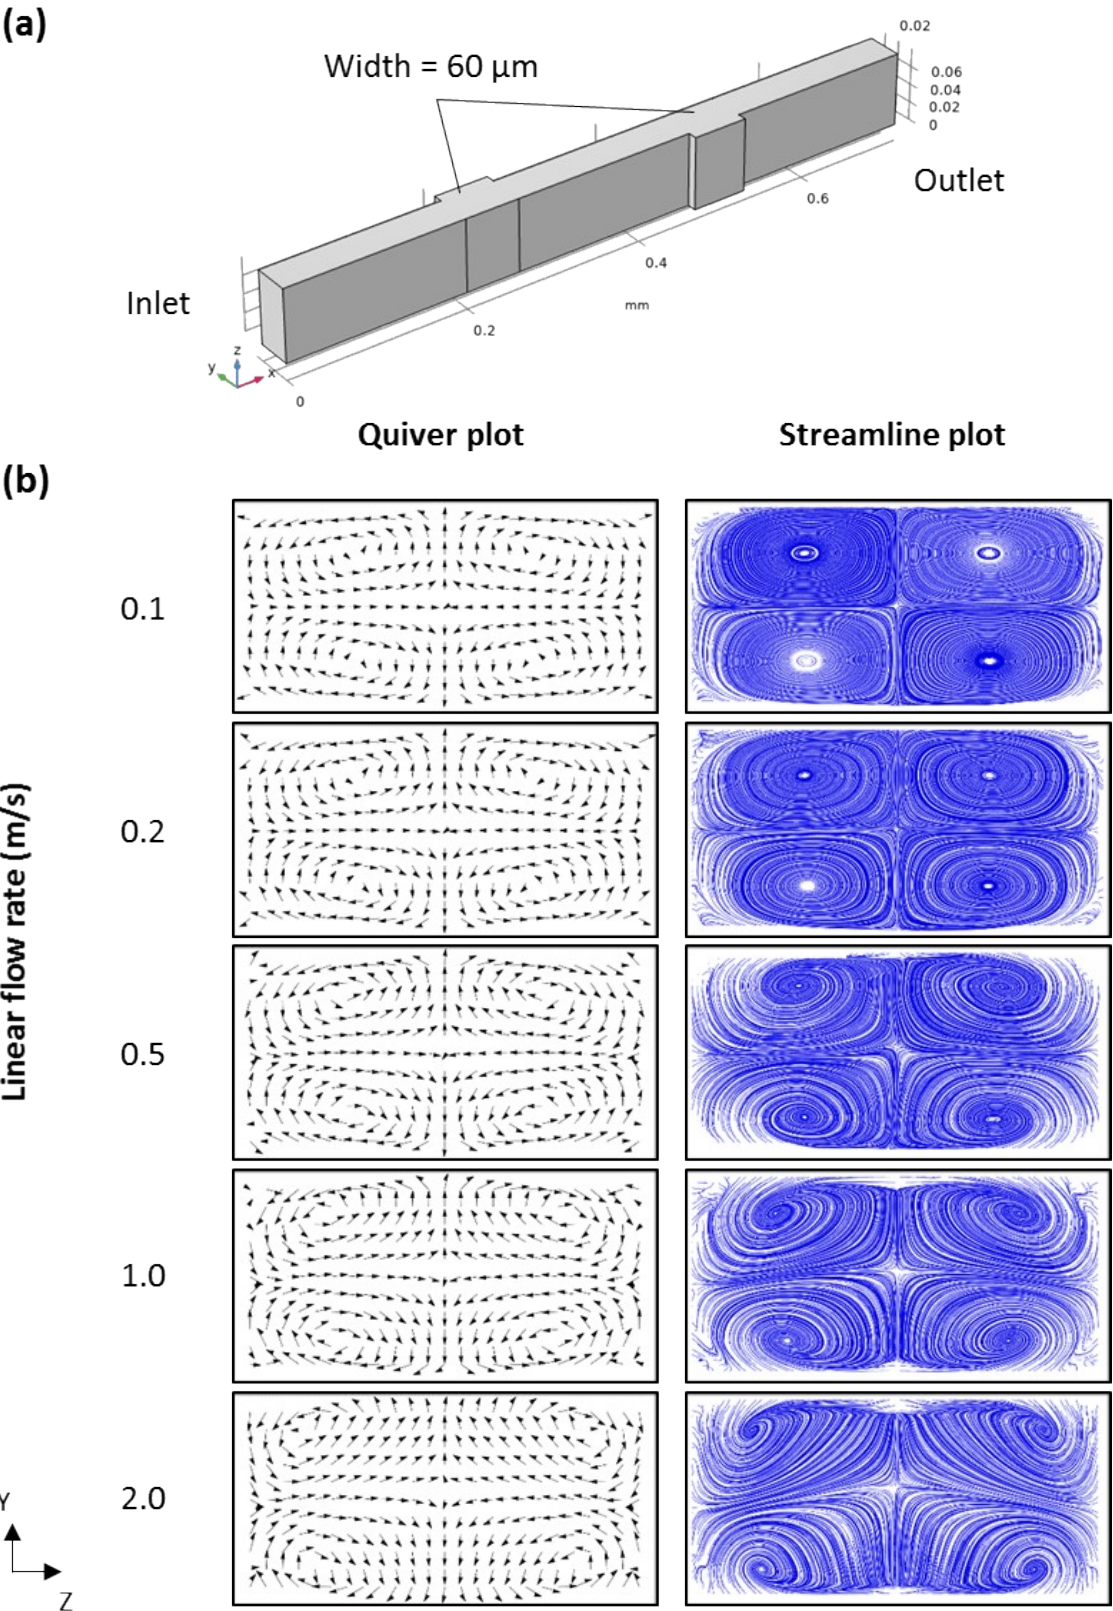

61  
62 **Figure S5. Simulation result of secondary flows induced by an HAR alternating orifice.**  
63 (a) CFD Model. (b) Quiver and streamline plots of the secondary flow.

Supplementary information

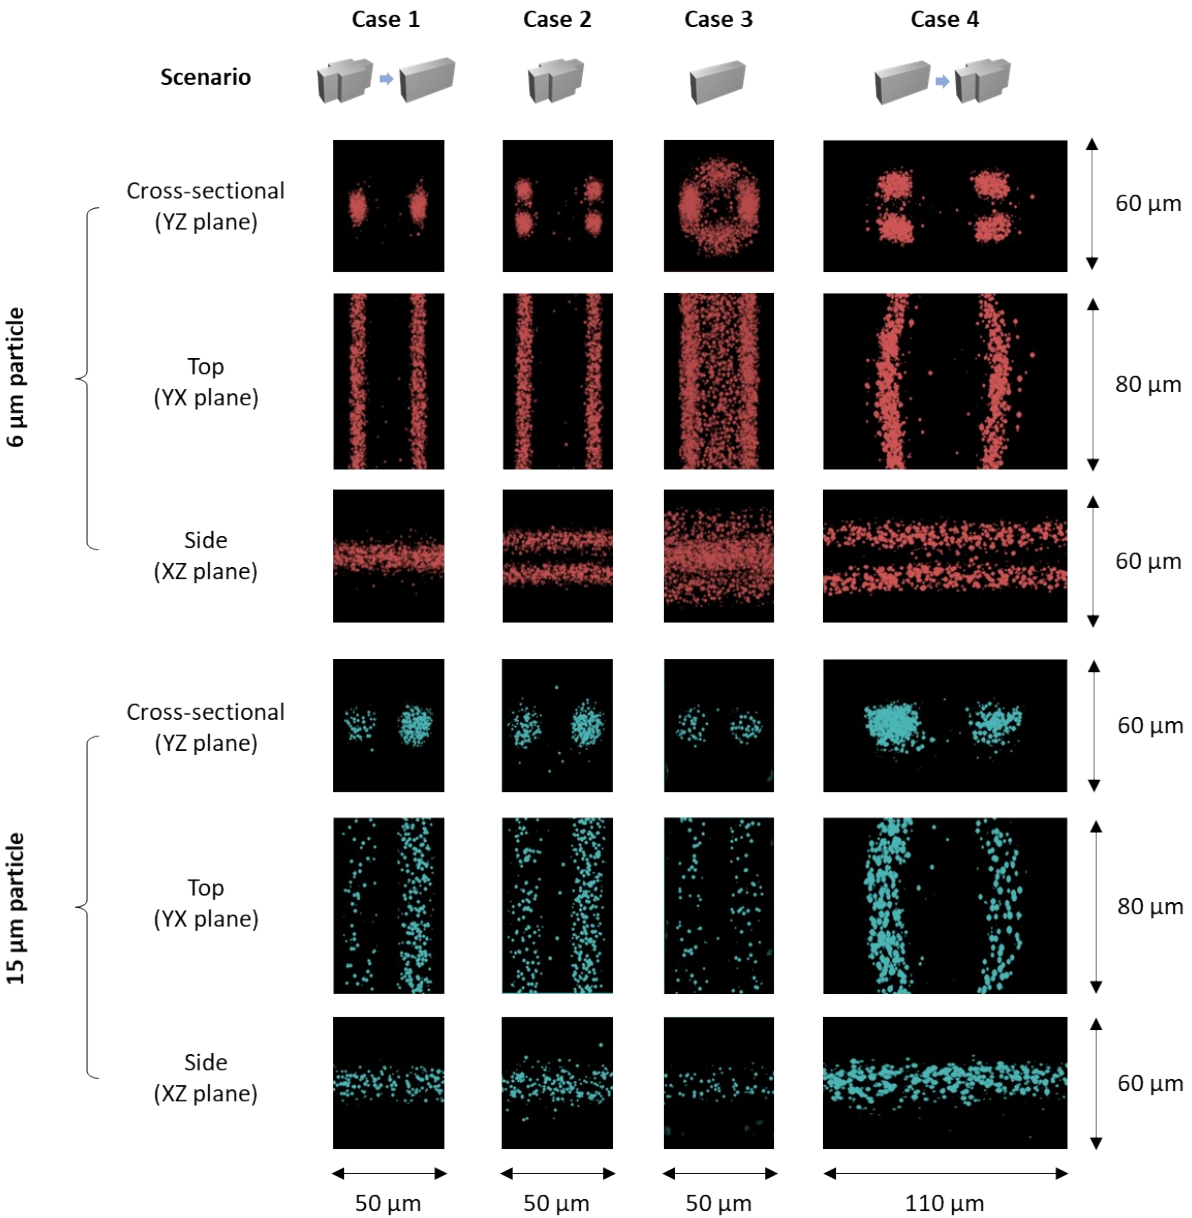

64

65 **Figure S6. Projected view of particle flow trajectories acquired using a confocal**  
 66 **microscope. Top: 6 μm particle; Bottom: 15 μm particle.**



## Supplementary information

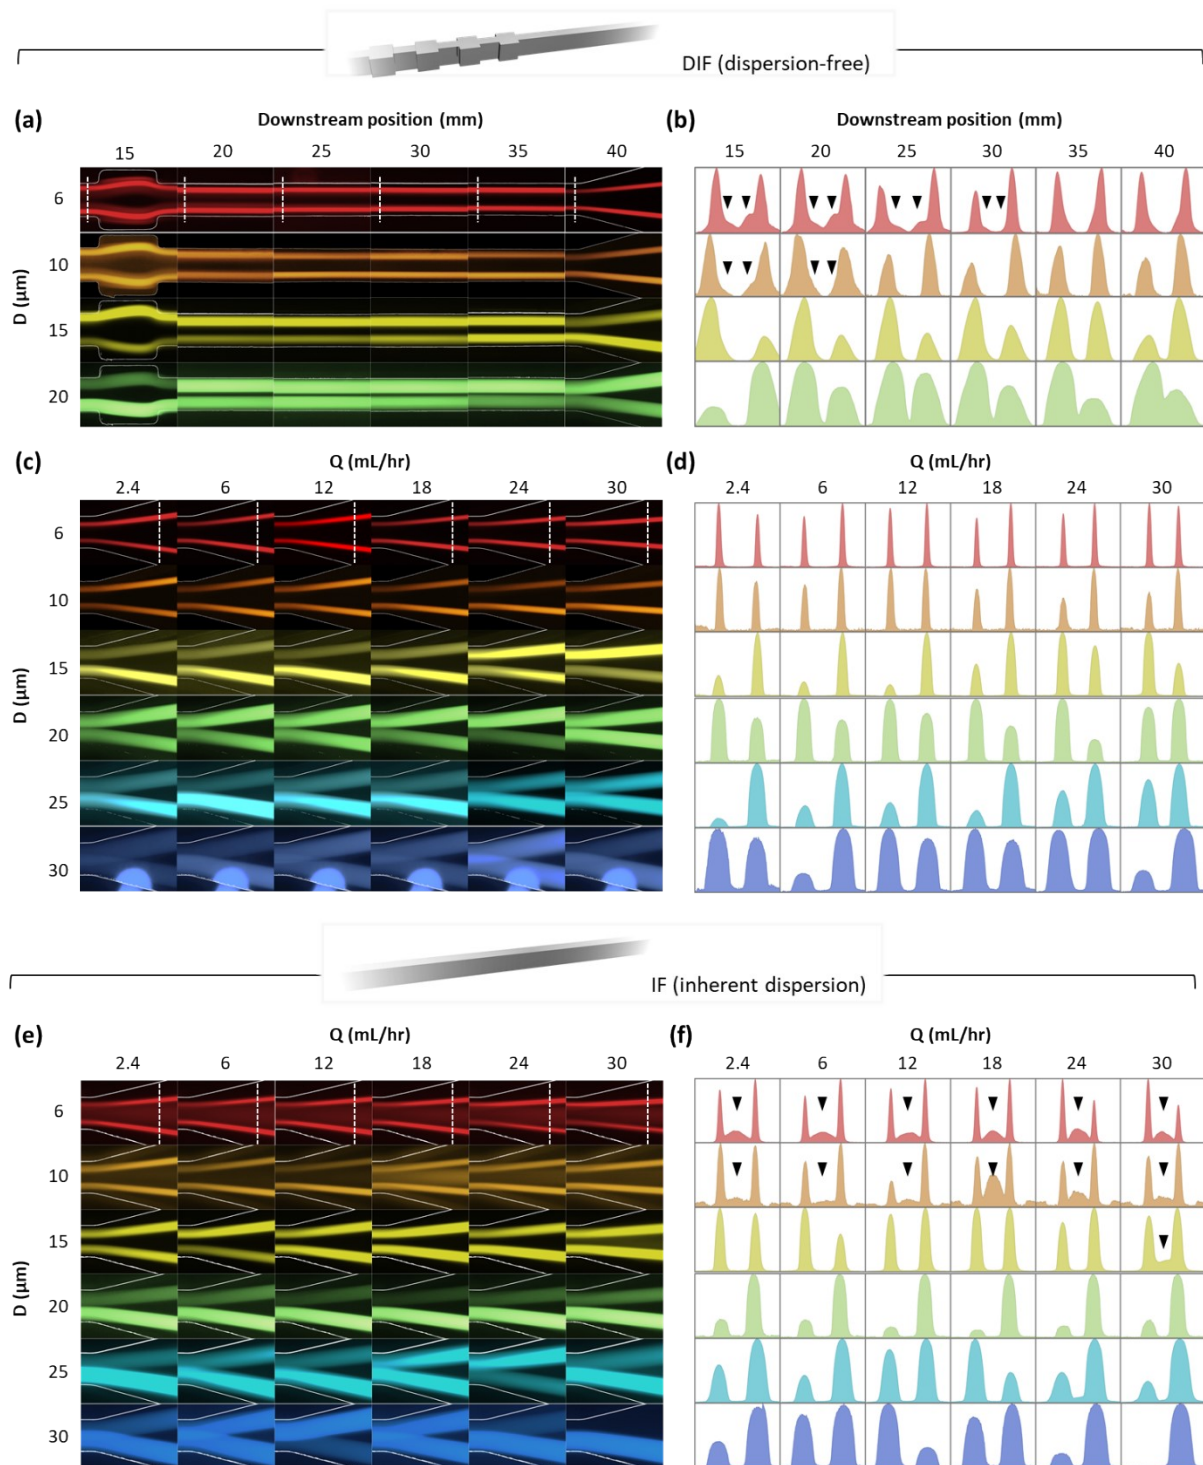

67

68 **Figure S7. Dispersion of single-plane focusing by DIF (Top) and standard IF (Bottom).**

69 Trajectories of 6 different sets of fast-flowing fluorescence microspheres, each with different

70 size, were individually captured by fluorescence microscopy. **(a-b) Focusing mechanism of**

71 **DIF.** Images were captured at 6 downstream positions at the flow rate of 18 mL/hr to visualize

72 the evolution of focusing pattern in DIF system. The intensity profiles at the locations indicated

73 by white dotted lines in (a) are plotted in (b). **(c-f) Consistency across particle sizes.** Images

74 were captured at different volumetric flow rates ( $Q$ ) at the downstream distance of 40 mm in

75 (c) DIF system and (e) HAR rectangular straight channel. The intensity profiles at the locations

76 indicated by white dotted lines in (c) and (e) are plotted in (d) and (f), respectively. Scale bar:

77 (a, c, e) 20  $\mu\text{m}$ . (b, d, f) 5  $\mu\text{m}$ .

## Supplementary information

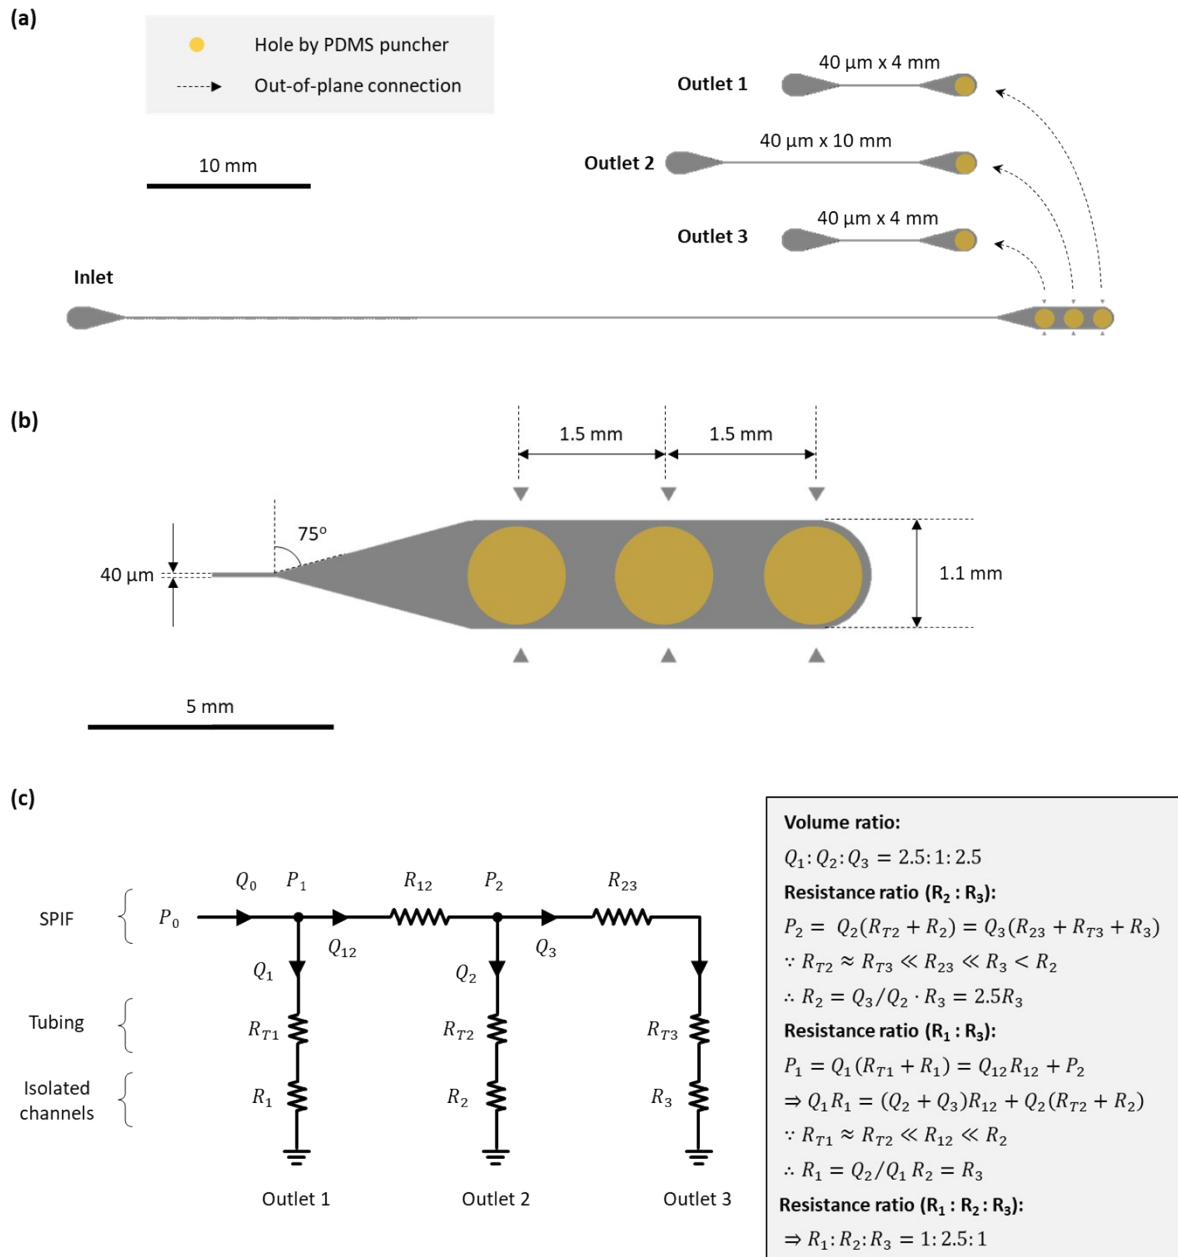

78  
79

80 **Figure S8. Design of the LIF filter.** This filter is designed to deplete 1/6 of input fluid in the  
 81 middle of the channel cross-section, which corresponds to  $\sim 8.9 \mu\text{m}$  thick layer according to the  
 82 parabolic flow profile. (a) Overview of the LIF filter. (b) Zoom-in view of the end of LIF  
 83 module. (c) Equivalent electrical circuit model.

84

Supplementary information

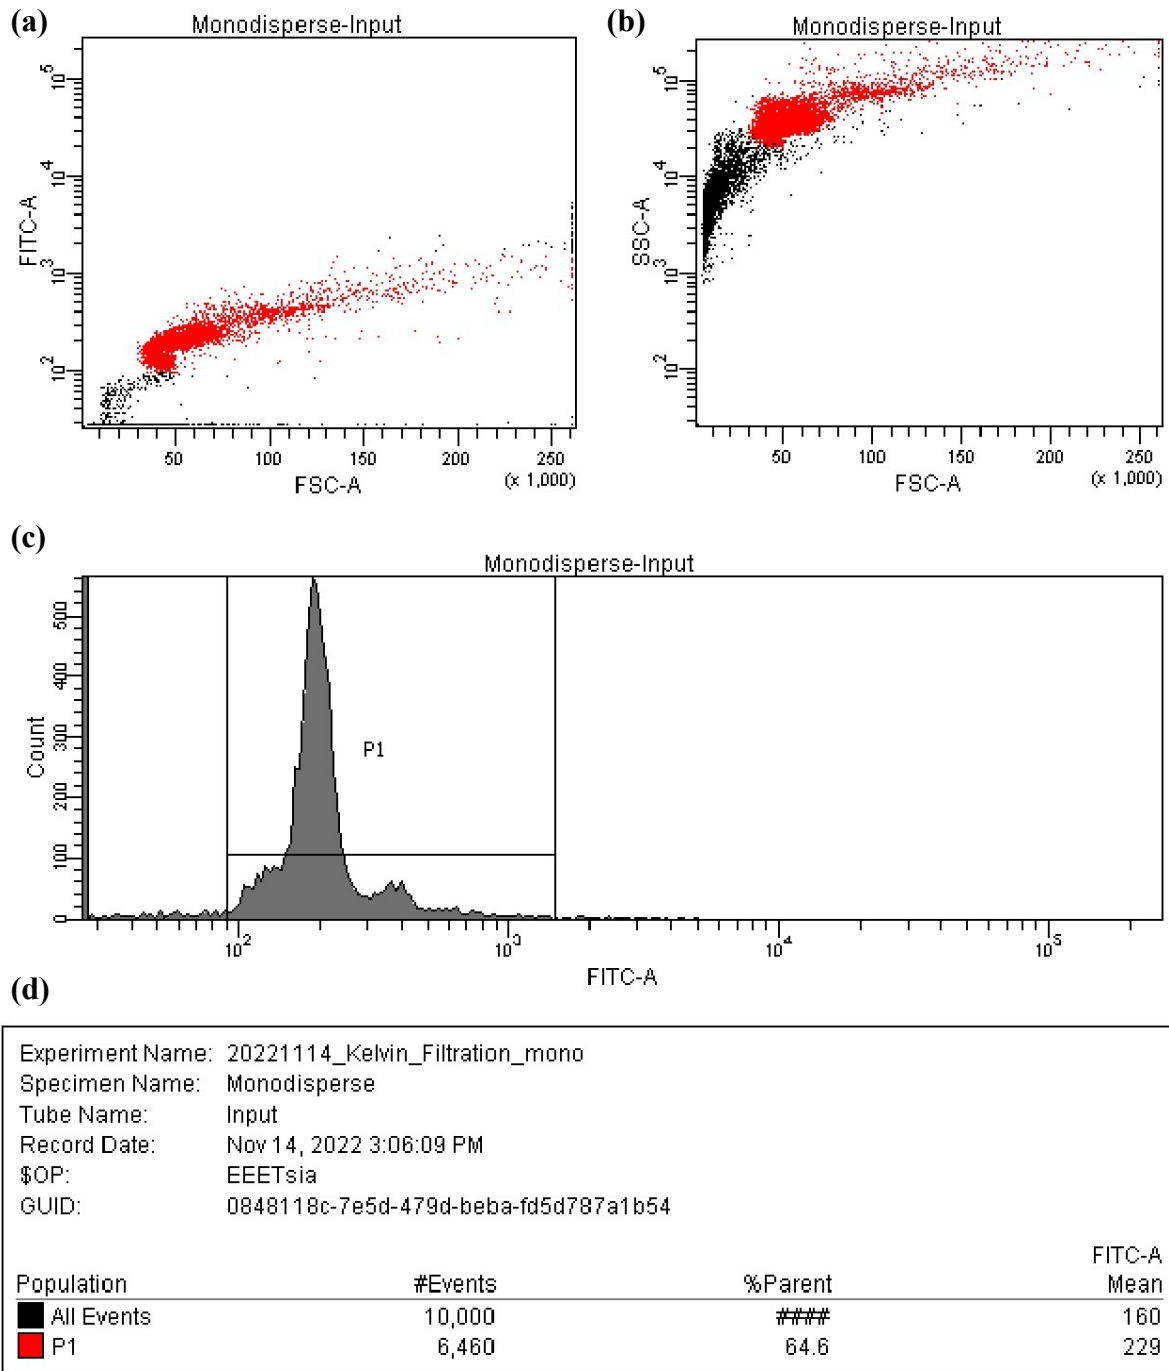

85

86 **Figure S9. Flow cytometry result of monodisperse sample from the input port.** (a) Scatter  
 87 plot of forward scattering signal (FCS) vs. green fluorescence signal (FITC-A). (b) Scatter plot  
 88 of forward scattering signal (FCS) vs. side scattering signal (SSC-A). (c) Histogram of green  
 89 fluorescence signal (FITC-A). (d) Statistics of gating result.

90

Supplementary information

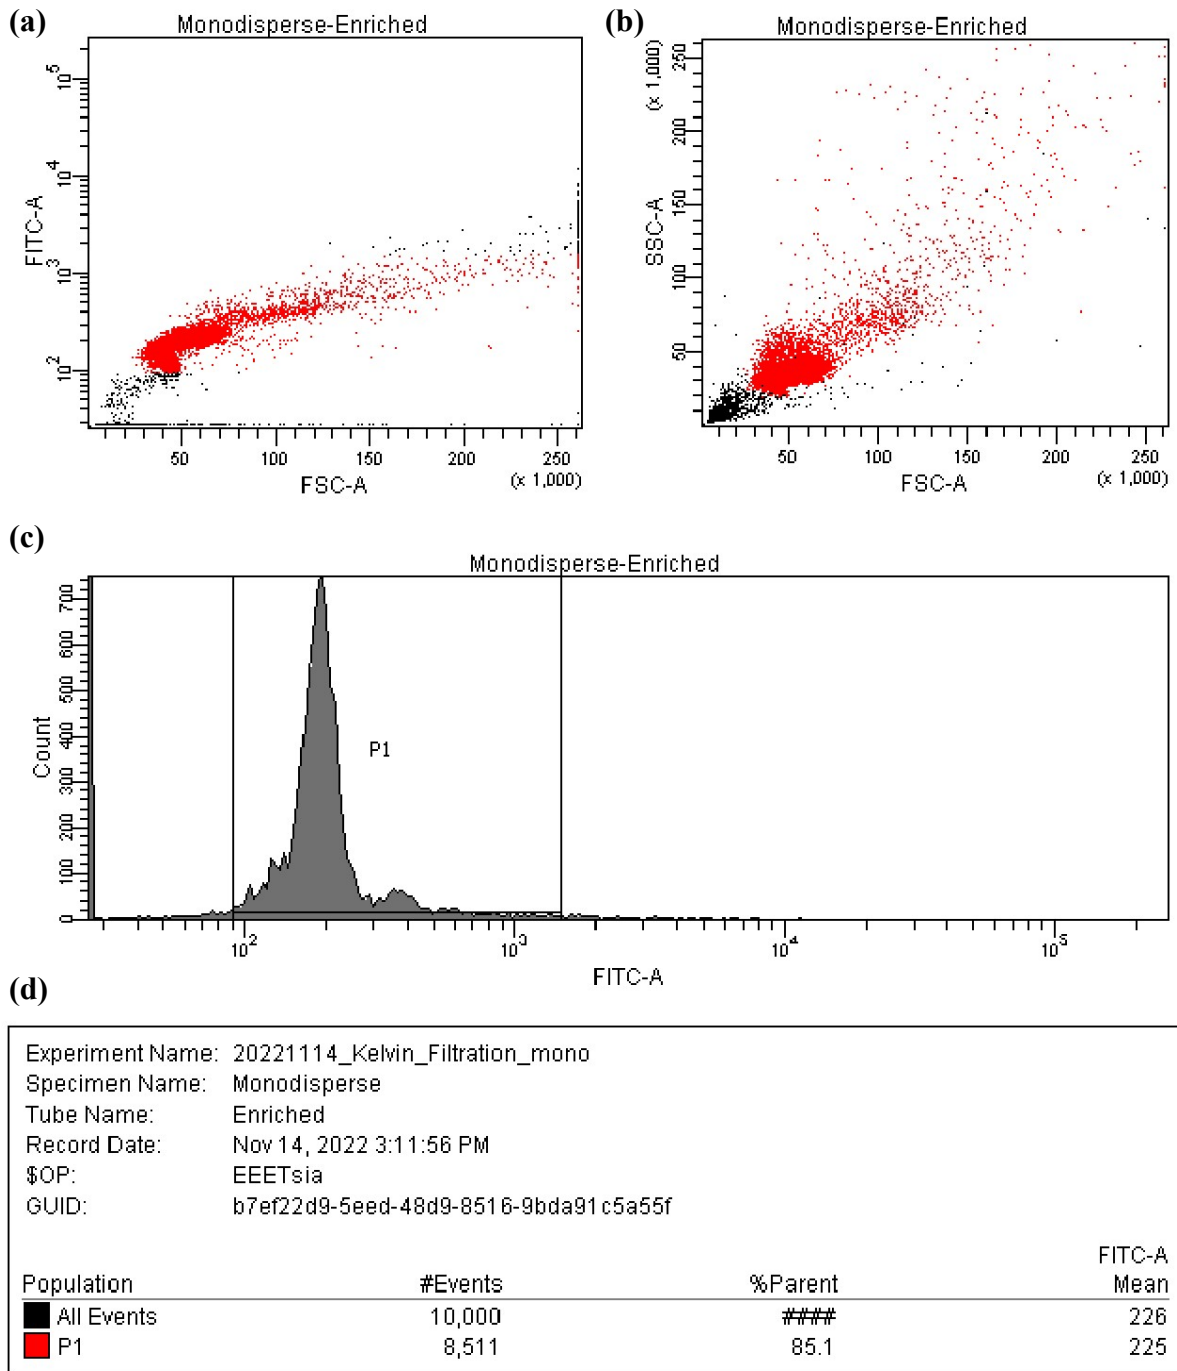

91

92 **Figure S10. Flow cytometry result of monodisperse sample from the enrichment port. (a)**

93 Scatter plot of forward scattering signal (FCS) vs. green fluorescence signal (FITC-A). **(b)**

94 Scatter plot of forward scattering signal (FCS) vs. side scattering signal (SSC-A). **(c)** Histogram

95 of green fluorescence signal (FITC-A). **(d)** Statistics of gating result.

96

Supplementary information

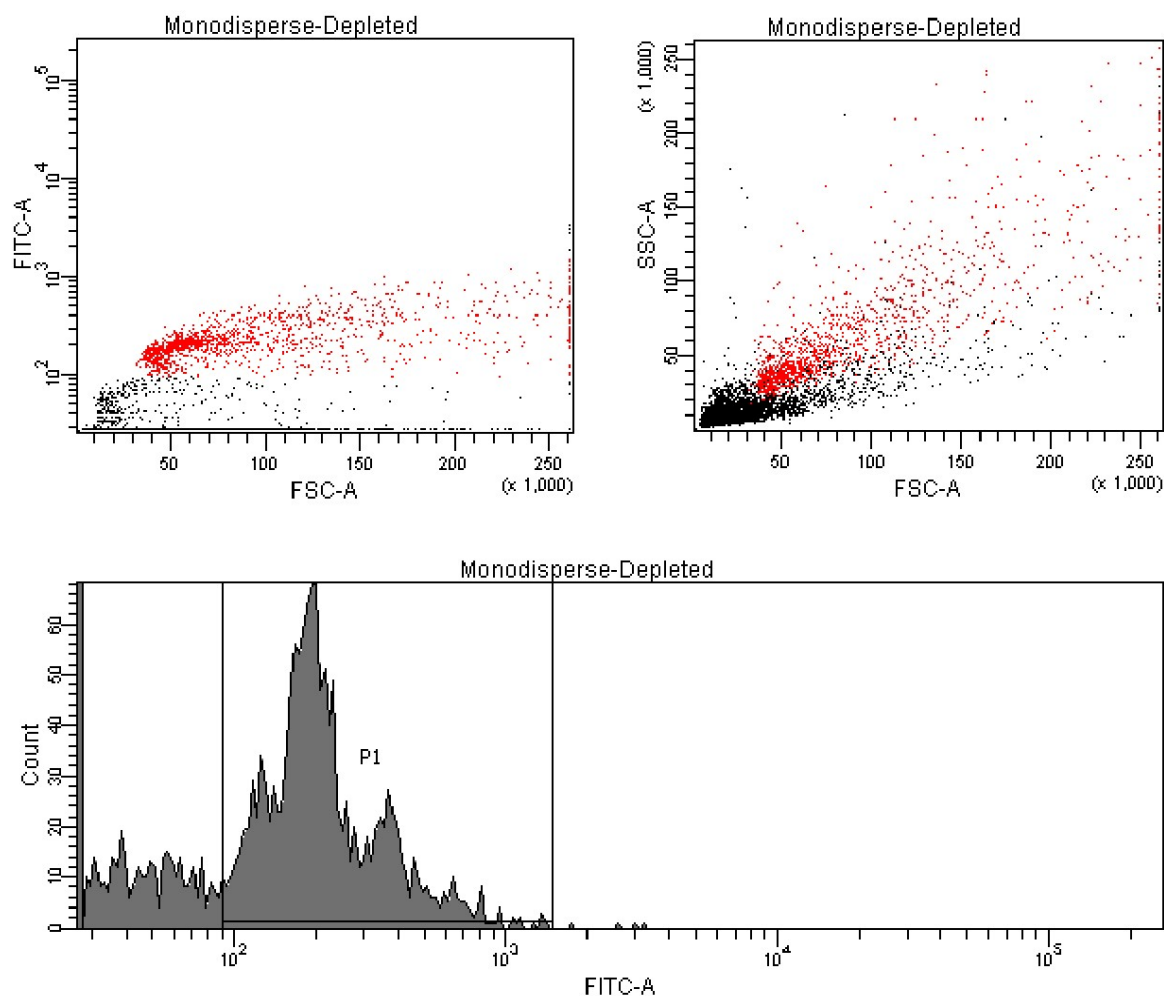

97

98 **Figure S11. Flow cytometry result of monodisperse sample from the depletion port. (a)**

99 Scatter plot of forward scattering signal (FCS) vs. green fluorescence signal (FITC-A). **(b)**

100 Scatter plot of forward scattering signal (FCS) vs. side scattering signal (SSC-A). **(c)** Histogram

101 of green fluorescence signal (FITC-A). **(d)** Statistics of gating result.

102

103

104

Supplementary information

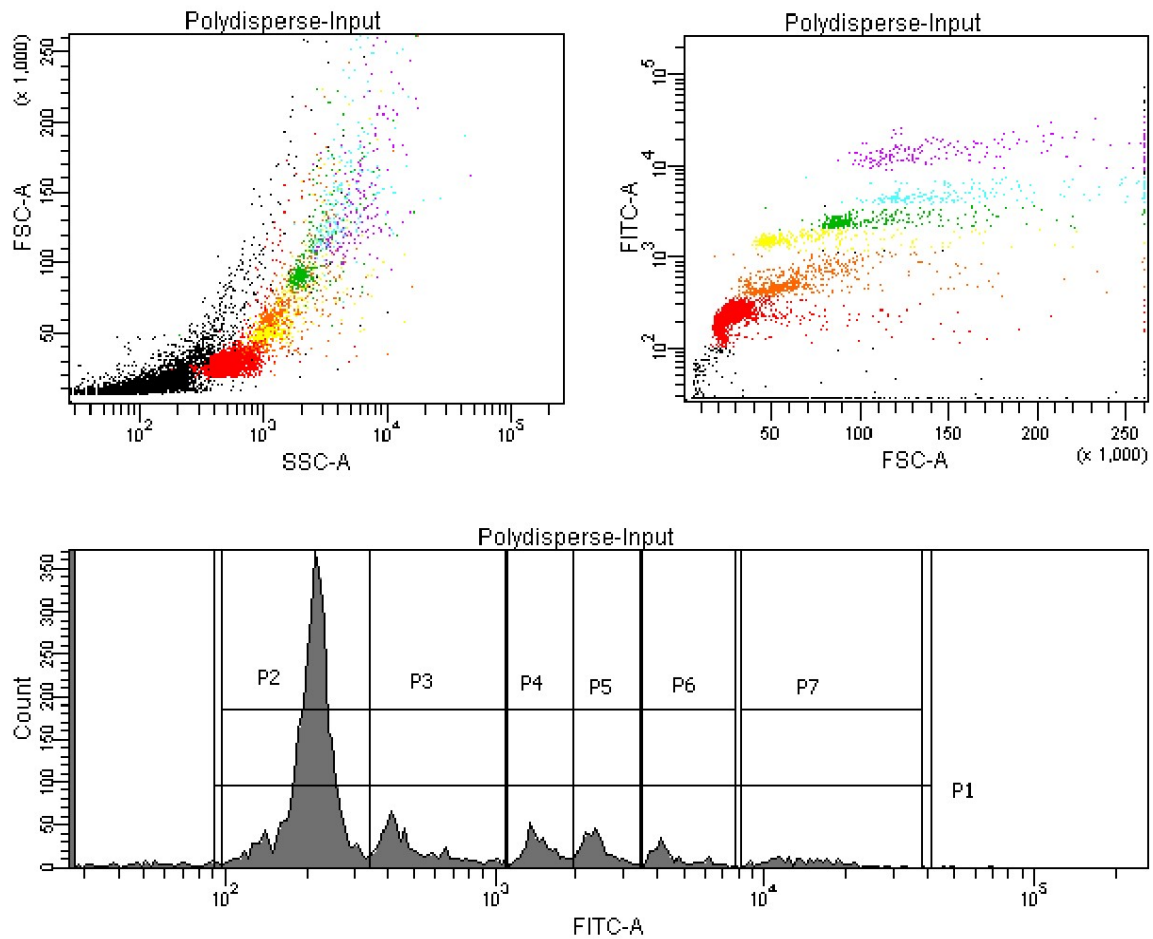

105

106 **Figure S12. Flow cytometry result of polydisperse sample from the input port. (a)** Scatter  
 107 plot of forward scattering signal (FCS) vs. green fluorescence signal (FITC-A). **(b)** Scatter plot  
 108 of forward scattering signal (FCS) vs. side scattering signal (SSC-A). **(c)** Histogram of green  
 109 fluorescence signal (FITC-A). **(d)** Statistics of gating result.

110

Supplementary information

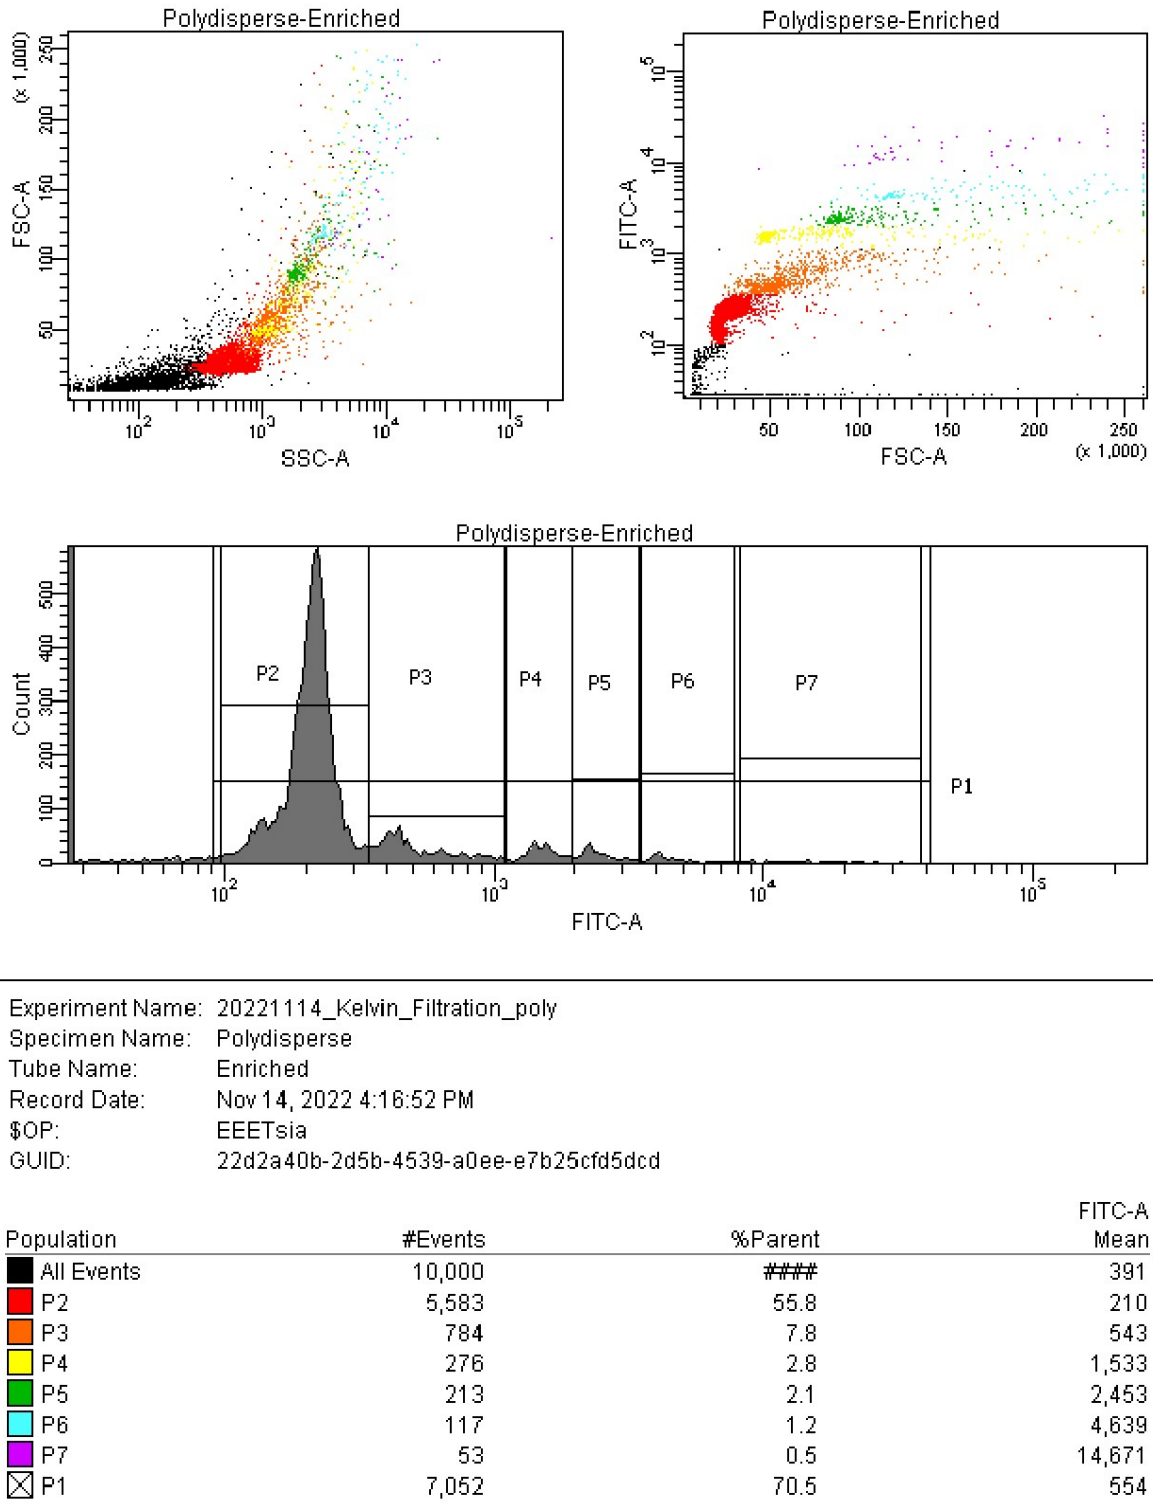

111

112 **Figure S13. Flow cytometry result of polydisperse sample from the enrichment port. (a)**  
 113 **Scatter plot of forward scattering signal (FCS) vs. green fluorescence signal (FITC-A). (b)**  
 114 **Scatter plot of forward scattering signal (FCS) vs. side scattering signal (SSC-A). (c) Histogram**  
 115 **of green fluorescence signal (FITC-A). (d) Statistics of gating result.**

116

Supplementary information

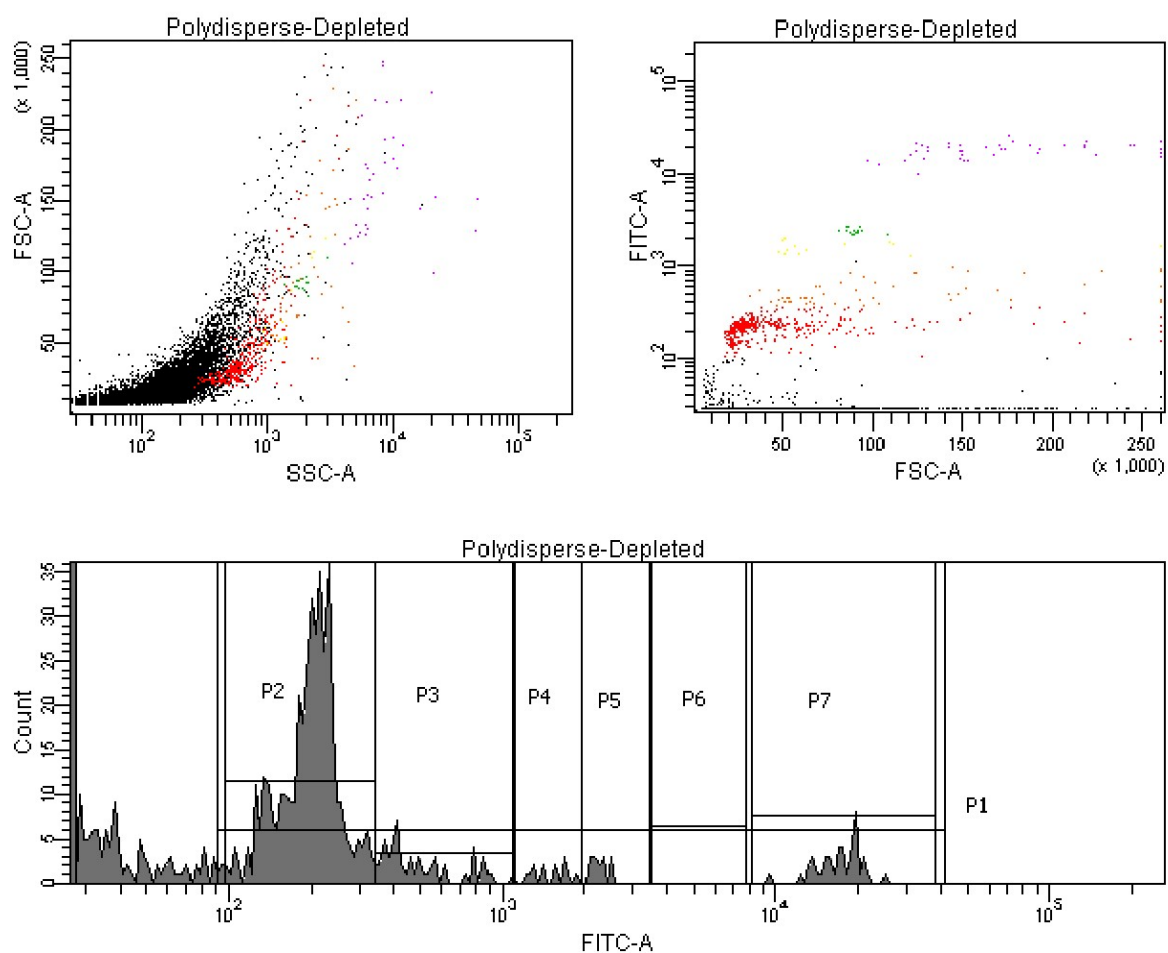

Experiment Name: 20221114\_Kelvin\_Filtration\_poly  
 Specimen Name: Polydisperse  
 Tube Name: Depleted  
 Record Date: Nov 14, 2022 4:29:51 PM  
 \$OP: EEETsia  
 GUID: ce444559-8206-4792-849a-733b952ab27c

| Population | #Events | %Parent | FITC-A Mean |
|------------|---------|---------|-------------|
| All Events | 10,000  | ###     | 89          |
| P2         | 393     | 3.9     | 203         |
| P3         | 53      | 0.5     | 518         |
| P4         | 13      | 0.1     | 1,530       |
| P5         | 14      | 0.1     | 2,292       |
| P6         | 0       | 0.0     | ###         |
| P7         | 42      | 0.4     | 17,546      |
| P1         | 519     | 5.2     | 1,729       |

117

118 **Figure S14. Flow cytometry result of polydisperse sample from the depletion port. (a)**  
 119 **Scatter plot of forward scattering signal (FCS) vs. green fluorescence signal (FITC-A). (b)**  
 120 **Scatter plot of forward scattering signal (FCS) vs. side scattering signal (SSC-A). (c) Histogram**  
 121 **of green fluorescence signal (FITC-A). (d) Statistics of gating result.**

122



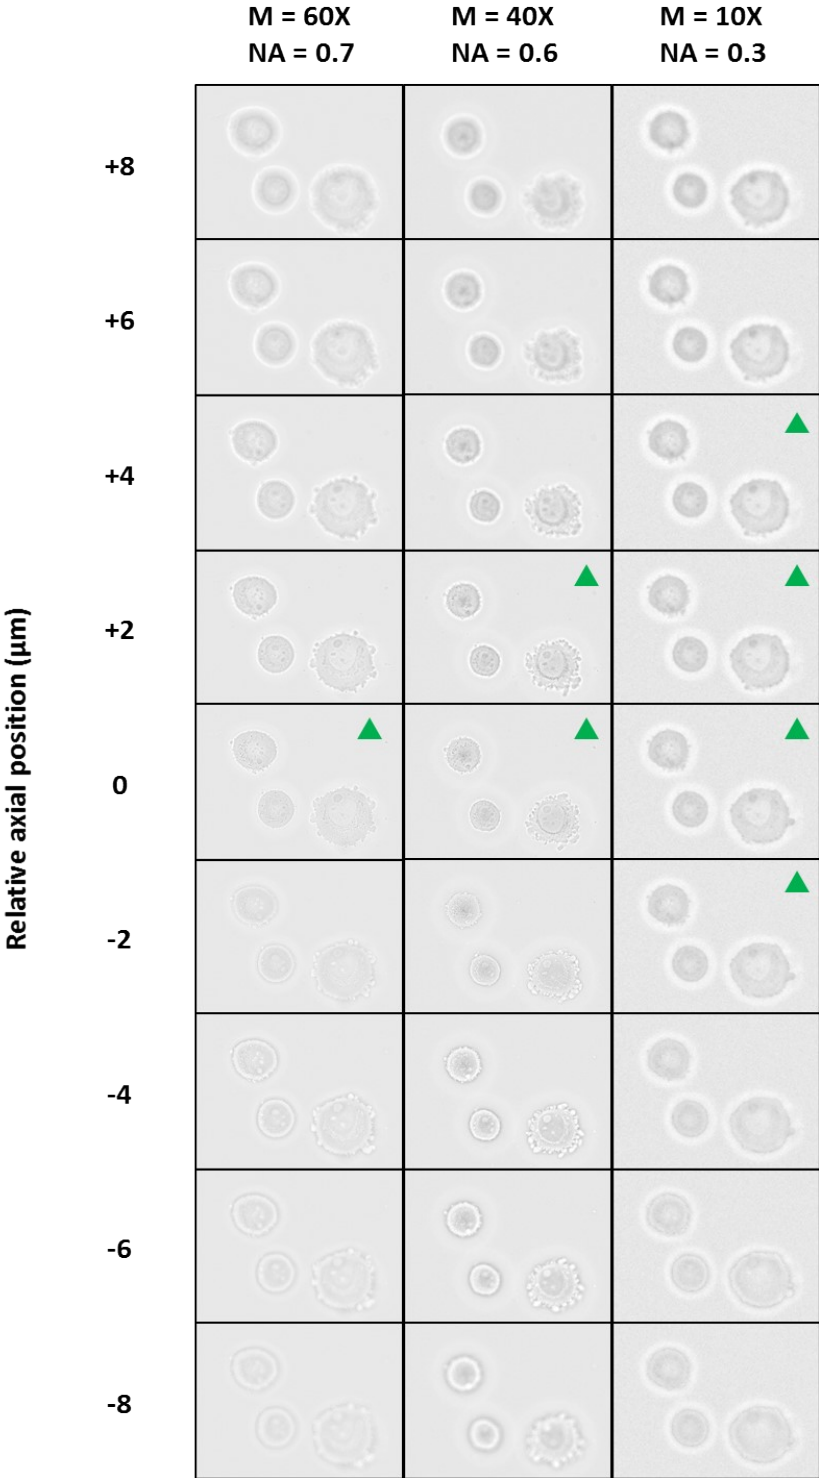

123  
 124  
 125  
 126  
 127  
 128  
 129  
 130

**Figure S15. Effect of varying axial (z-) position and numerical aperture (NA) on images.**

Three MB231 cells were captured at different axial (z-) positions under three different magnifications (M) and numerical aperture (NA). The Rayleigh range are 1.27 μm, 1.73 μm and 6.91 μm for 60X, 40X and 10X magnifications, respectively. Green triangles indicates images in focus.

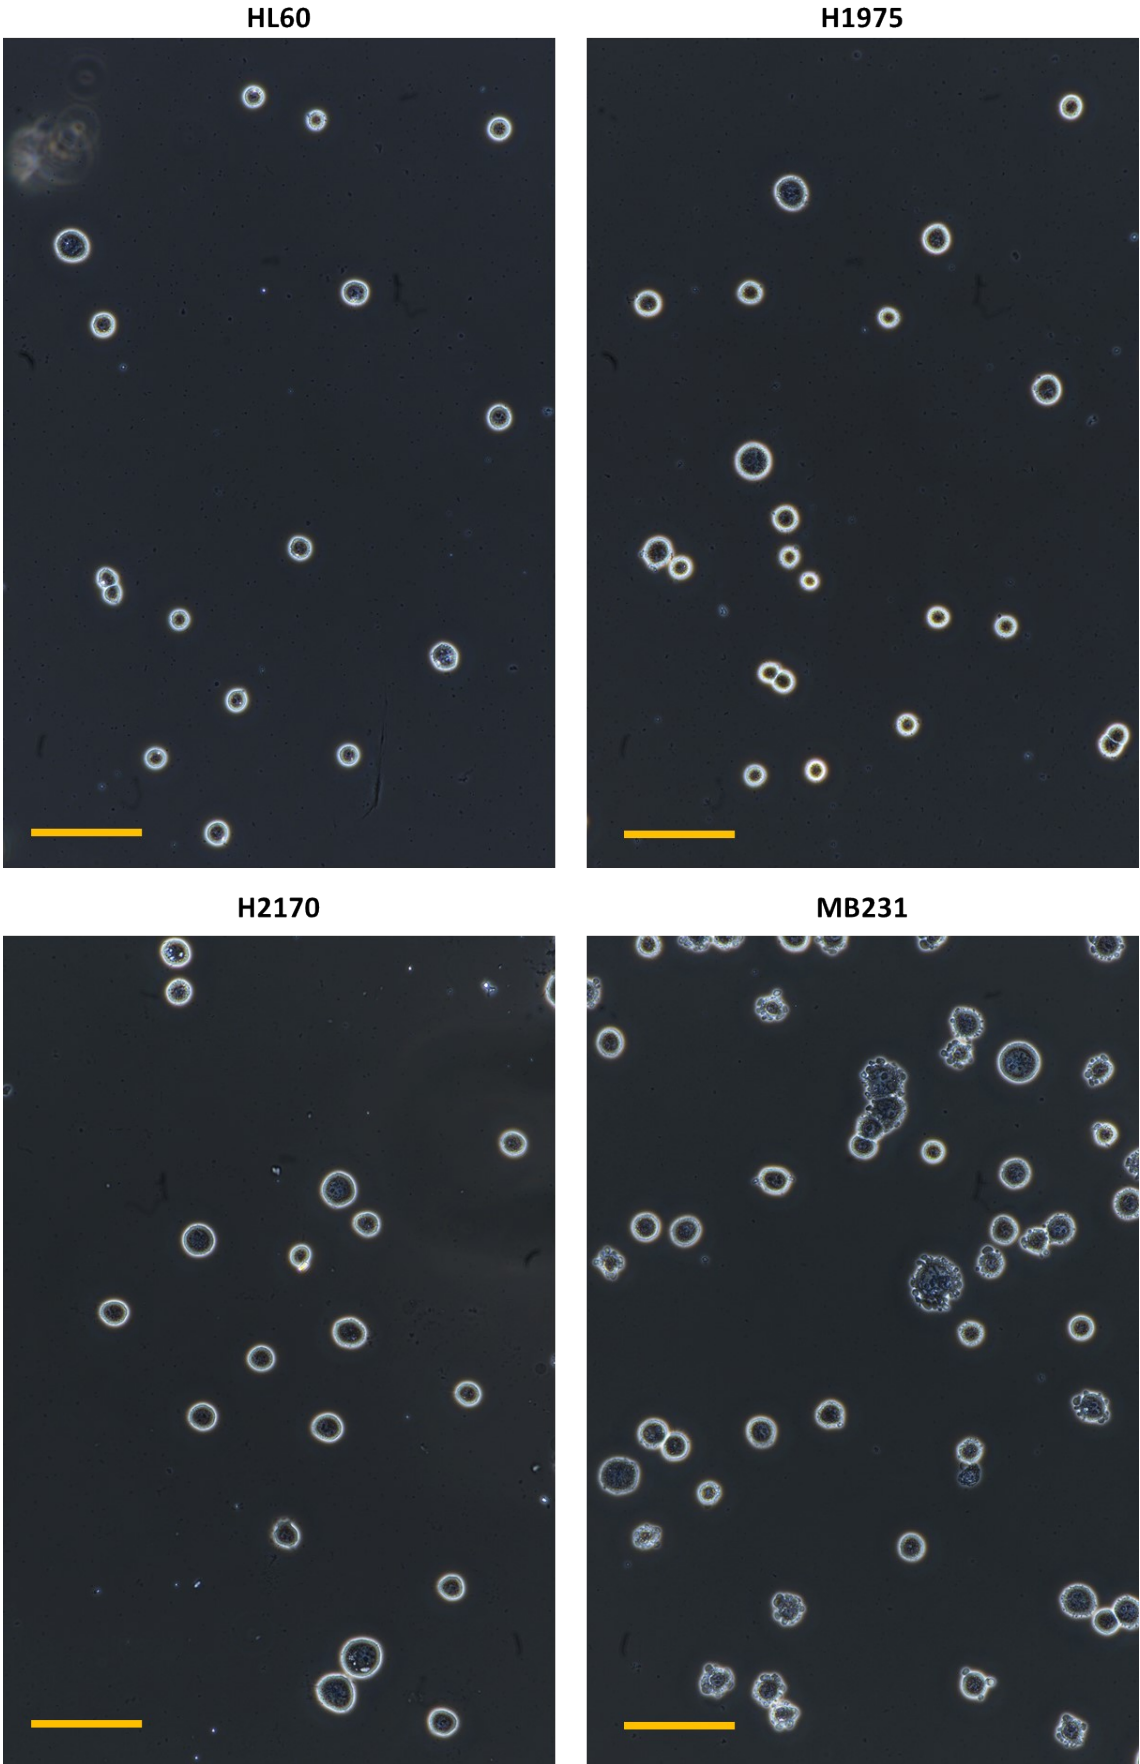

131

132 **Figure S16. 20X phase-contrasted microscopic images of four cancer cell lines. Scale bar =**

133 100  $\mu$ m.

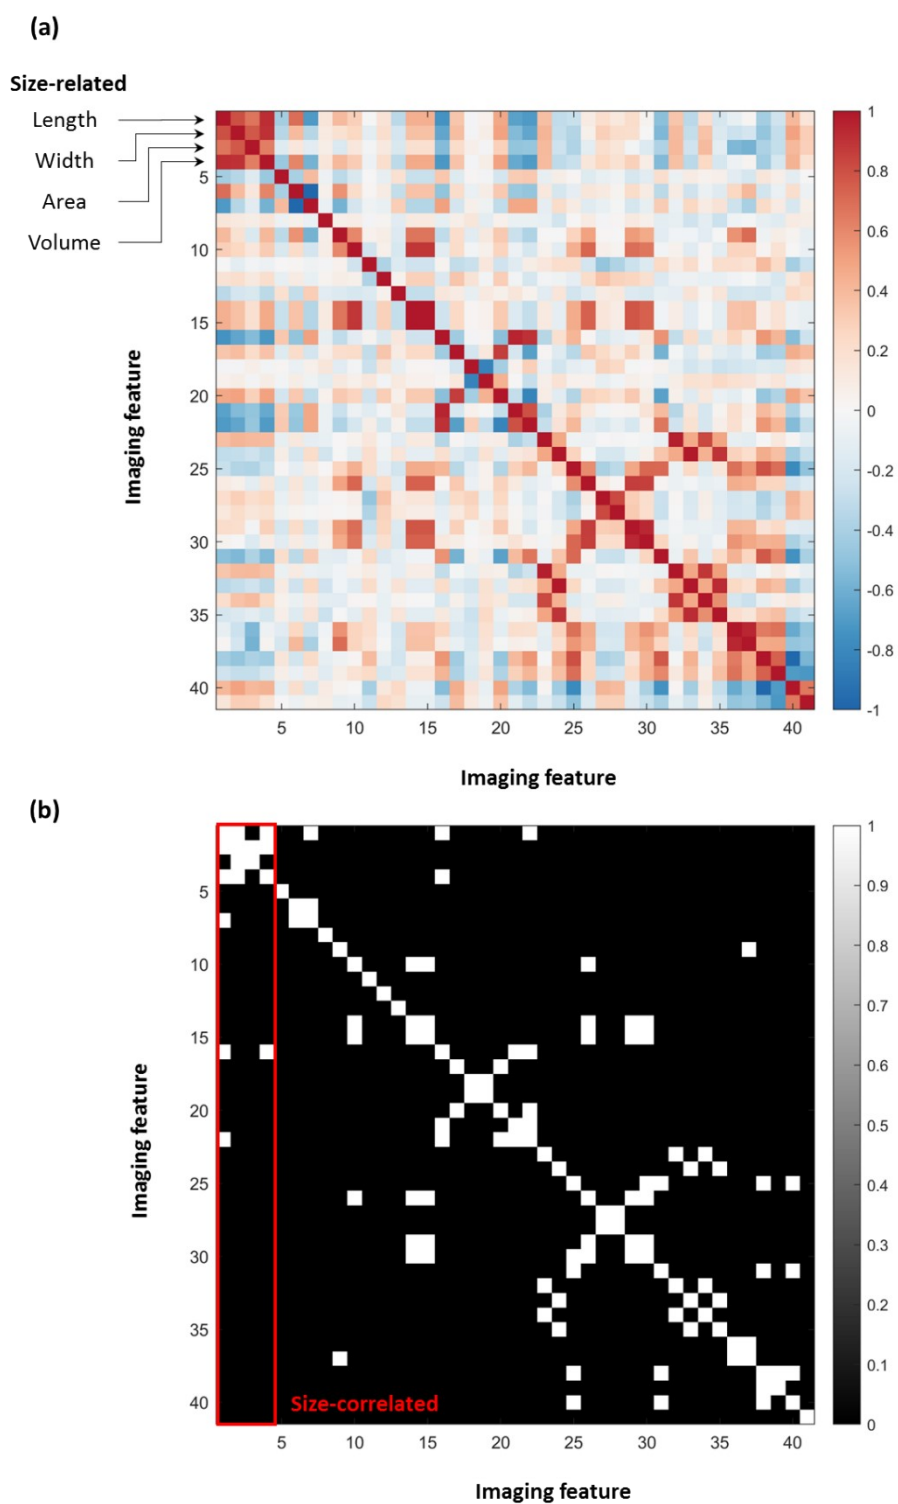

134

135 **Figure S17. Correlation analysis of 41 imaging features.** These features are extracted from  
 136 the bright-field image and the corresponding binary mask. Details of features refer to Table S1-  
 137 2. The first four features (i.e., length, width, area and volume) directly relate to particle size. (a)  
 138 Correlation matrix (b) Binary matrix showing correlations that have magnitude  $>0.7$ . The red  
 139 box encircles the region referring to size-correlated.

140

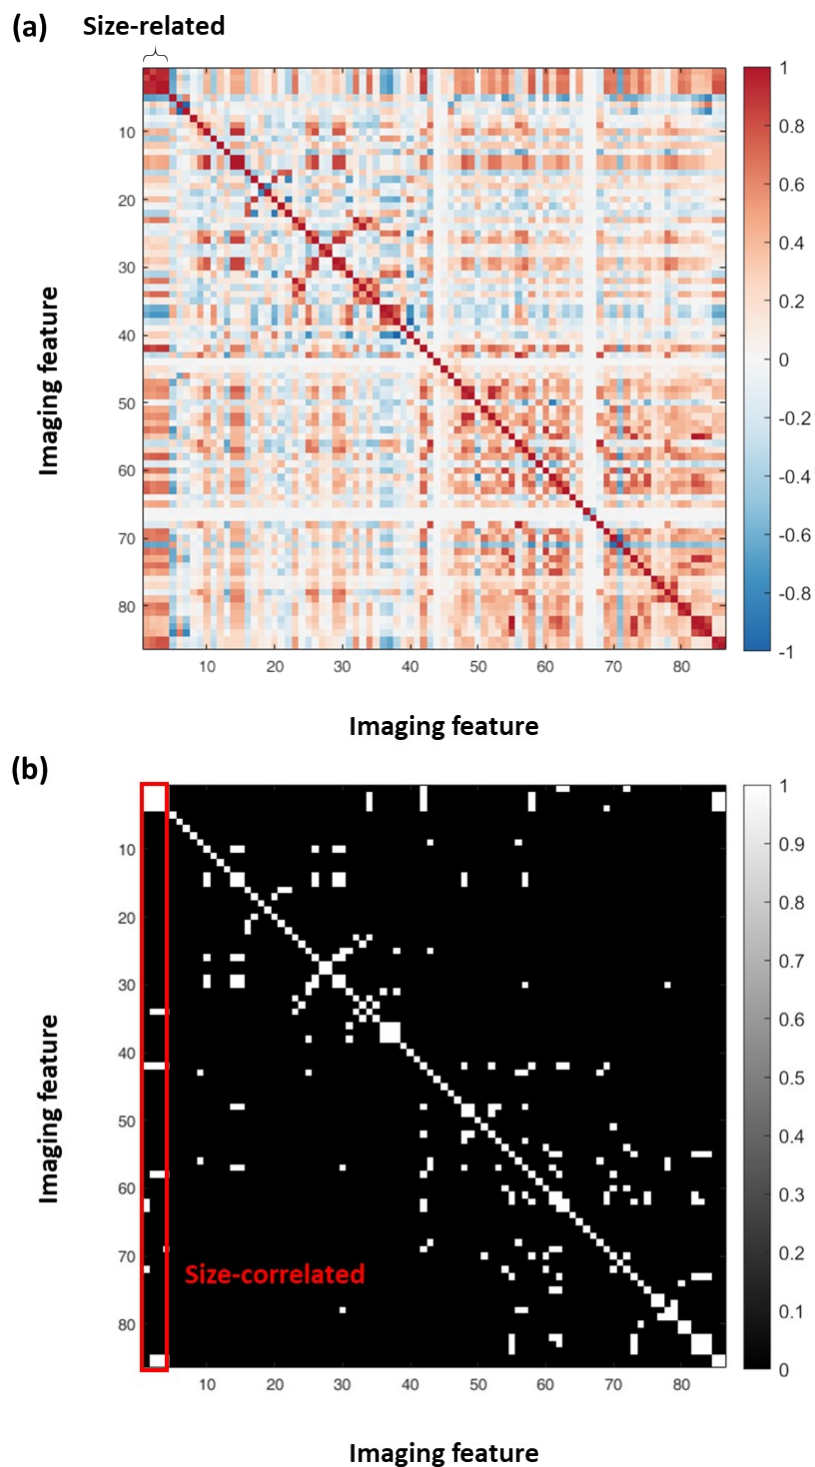

141

142 **Figure S18. Correlation analysis of 86 imaging features.** These features are extracted from  
 143 the bright-field and quantitative phase images and the corresponding binary mask. Details of  
 144 features refer to Table S1-2. The first four features (i.e. length, width, area and volume) directly  
 145 relate to particle size. **(a)** Correlation matrix **(b)** Binary matrix showing correlations that have  
 146 magnitude  $>0.7$ . The red box encircles the region referring to size-correlated.

147

Supplementary information

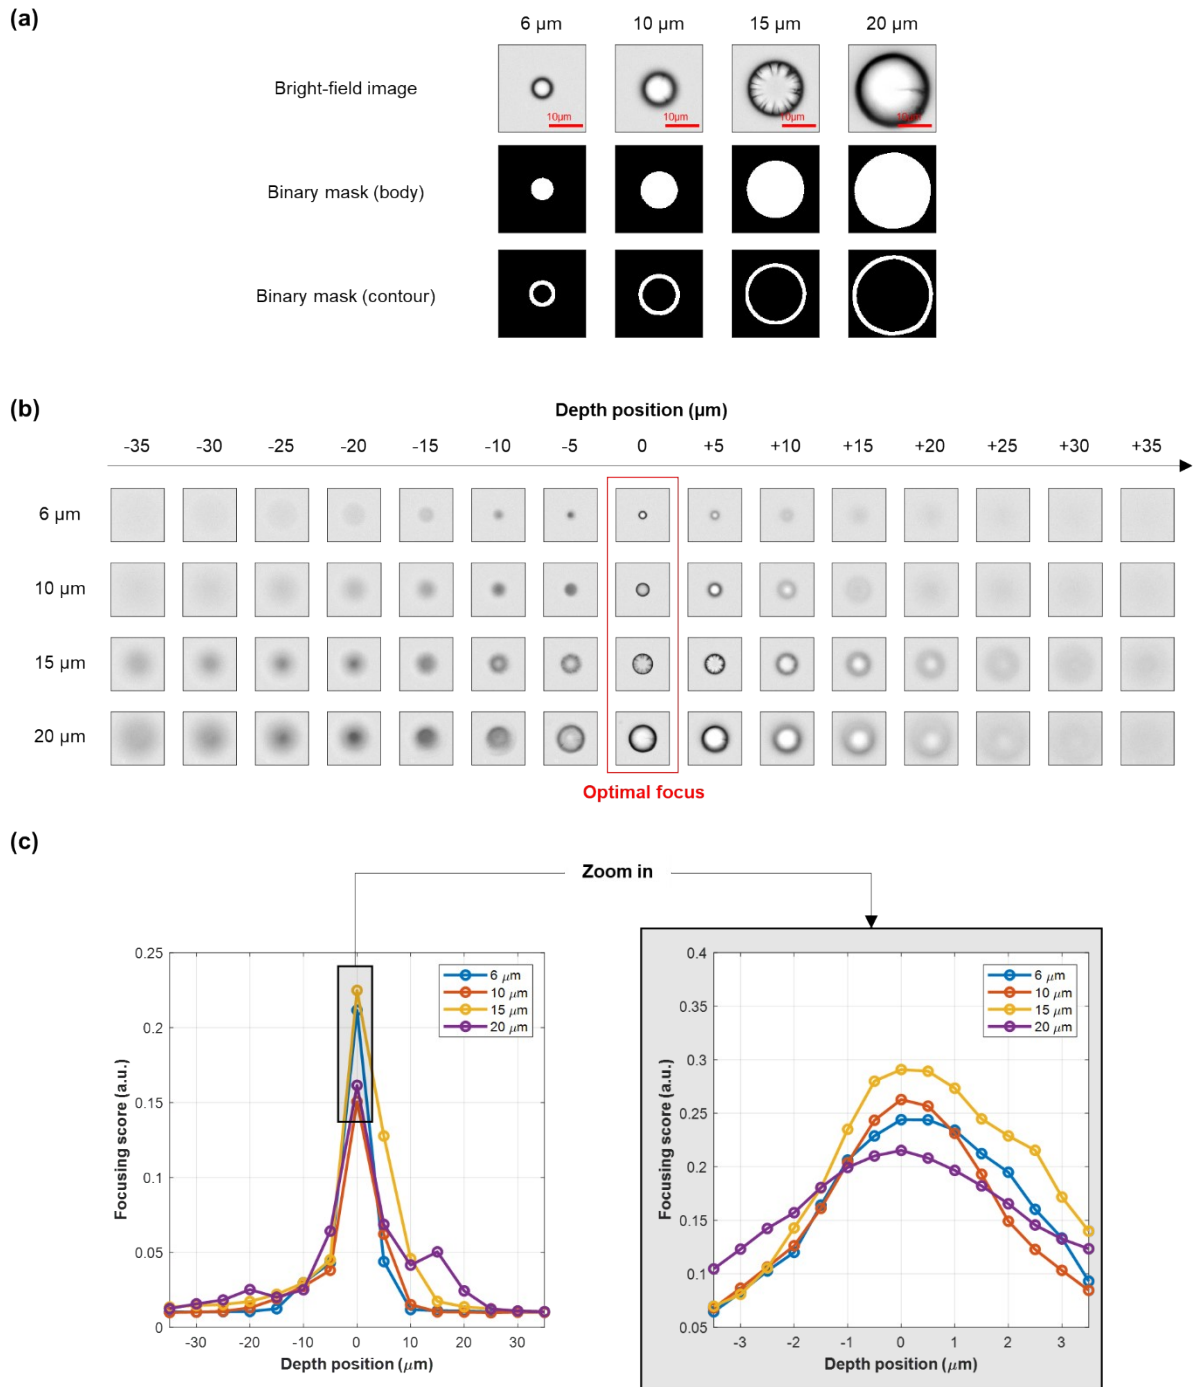

148

149 **Figure S19. Method to classify focusing condition of microparticles.** (a) Bright-field image,

150 the binary mask of body, and the binary mark of contour of 6 $\mu\text{m}$ , 10 $\mu\text{m}$ , 15  $\mu\text{m}$ , and 20 $\mu\text{m}$

151 microparticles. (b) The morphology of particles of different sizes at different depth positions.

152 (c) Two line plots showing the focusing score of particles of different sizes at different depth

153 positions. Left: from 35 $\mu\text{m}$  to +35 $\mu\text{m}$ . Right: from -3 $\mu\text{m}$  to +3 $\mu\text{m}$ .

154

155 **Table S1: Ratio of residual zone (equivalently loss) of the HAR rectangular pipe at**  
 156 **various particle sizes and flow rates (by direct numerical simulation).**

| Particle size ( $\mu\text{m}$ ) | Volumetric flow rate (mL/hr) |       |       |
|---------------------------------|------------------------------|-------|-------|
|                                 | 6                            | 18    | 30    |
| 5                               | 36.7%                        | 38.0% | 34.3% |
| 15                              | 13.8%                        | 6.5%  | 4.8%  |
| 20                              | 2.5%                         | 0.0%  | 0.0%  |
| 25                              | 0.0%                         | 0.0%  | 0.0%  |

157

158 **Table S2: Loss of the single-plane DIF system (100%-yield) at various particle sizes and**  
 159 **flow rates (by experiment).**

| Particle size ( $\mu\text{m}$ ) | Volumetric flow rate (mL/hr) |      |      |      |      |      |
|---------------------------------|------------------------------|------|------|------|------|------|
|                                 | 2.4                          | 6    | 12   | 18   | 24   | 30   |
| 6                               | 4.4%                         | 4.2% | 3.3% | 4.3% | 6.1% | 5.3% |
| 10                              | 0.2%                         | 0.1% | 0.0% | 0.0% | 0.5% | 0.4% |
| 15                              | 0.2%                         | 0.3% | 0.1% | 0.4% | 0.1% | 0.2% |
| 20                              | 0.4%                         | 0.5% | 0.5% | 0.2% | 0.0% | 0.0% |
| 25                              | 3%                           | 2%   | 5%   | 0%   | 2%   | 0%   |

160

161 **Table S3: Loss of the HAR rectangular pipe (100%-yield) at various particle sizes and**  
 162 **flow rates (by experiment).**

| Particle size ( $\mu\text{m}$ ) | Volumetric flow rate (mL/hr) |       |       |       |       |       |
|---------------------------------|------------------------------|-------|-------|-------|-------|-------|
|                                 | 2.4                          | 6     | 12    | 18    | 24    | 30    |
| 6                               | 39.9%                        | 33.9% | 29.0% | 32.2% | 34.4% | 41.7% |
| 10                              | 15.8%                        | 6.3%  | 17.5% | 22.2% | 25.3% | 15.6% |
| 15                              | 0.9%                         | 1.7%  | 1.3%  | 1.2%  | 10.2% | 16.6% |
| 20                              | 0.8%                         | 0.1%  | 0.4%  | 1.0%  | 0.0%  | 0.0%  |
| 25                              | 2%                           | 4%    | 2%    | 2%    | 1%    | 0%    |

163

164 **Table S4: Area under curve (AUC) of the receiver-operating-characteristic (ROC) curve**  
 165 **analysis between 5 types of cells.**

|                                 |                 | Size correlated | Size uncorrelated | All   |
|---------------------------------|-----------------|-----------------|-------------------|-------|
| Cancer vs. PBMCs classification | PBMC vs. HL60   | 0.997           | 0.998             | 1.000 |
|                                 | PBMC vs. H1975  | 0.999           | 0.999             | 0.999 |
|                                 | PBMC vs. H2170  | 0.998           | 0.998             | 1.000 |
|                                 | PBMC vs. MB231  | 0.998           | 1.000             | 1.000 |
| Cancer type classification      | HL60 vs. H1975  | 0.918           | 0.936             | 0.925 |
|                                 | HL60 vs. H2170  | 0.903           | 0.937             | 0.944 |
|                                 | HL60 vs. MB231  | 0.940           | 0.988             | 0.990 |
|                                 | MB231 vs. H1975 | 0.670           | 0.896             | 0.780 |
|                                 | MB231 vs. H2170 | 0.738           | 0.935             | 0.943 |
| Cancer sub-type classification  | H1975 vs H2170  | 0.658           | 0.796             | 0.871 |

166

167 **Table S5: Equations and variable to characterise dispersion**

| Description                                     | Variables                   | Equation/Remarks                                                                 |
|-------------------------------------------------|-----------------------------|----------------------------------------------------------------------------------|
| Fluorescent intensity                           | $I(x, q, a)$                | <i>Regarded as the wieghting of lateral position</i>                             |
| Lateral position                                | $x$                         | <i>Regaradd as the dependent variable</i>                                        |
| Particle diameter                               | $a$                         |                                                                                  |
| Volumatric flow rate                            | $q$                         |                                                                                  |
| Number of sample points of particle diameter    | $n_a$                       |                                                                                  |
| Number of sample points of volumetric flow rate | $n_q$                       |                                                                                  |
| Total fluorecencet inetnsity                    | $I_{total}(q, a)$           | $\sum_x I(x, q, a)$                                                              |
| Mean lateral position                           | $\underline{x}(q, a)$       | $\sum_x (x \cdot I(x, q, a)) / I_{total}(q, a)$                                  |
| Standard deviation of lateral position          | $\sigma_x(q, a)$            | $\sqrt{\sum_x (I(x, q, a) \cdot (x - \underline{x}(q, a))^2) / I_{total}(q, a)}$ |
| Mean of mean lateral position                   | $\underline{x}(q)$          | $\sum_a (\underline{x}(q, a)) / n_a$                                             |
| Standard deviation of mean lateral position     | $\sigma_{\underline{x}}(q)$ | $\sqrt{\sum_a (\underline{x}(q, a) - \underline{x}(q))^2 / n_a}$                 |
| Spreading                                       | $SP$                        | $\sum_q \sum_a \sigma_x(q, a) / (n_q \cdot n_a)$                                 |
| Drifting                                        | $DR$                        | $\sum_q \sigma_{\underline{x}}(q) / n_q$                                         |
| Dispersion                                      | $DISP$                      | $DR + SP$                                                                        |

168

Supplementary information

169 **Table S6: Equations of single-cell features** (List of variables used can be found in Table S2)

170

| Feature name        | No. | Abbreviation           | Equation                                                                                         |
|---------------------|-----|------------------------|--------------------------------------------------------------------------------------------------|
| Length              | 1   |                        | $L_{major}$                                                                                      |
| Width               | 2   |                        | $L_{minor}$                                                                                      |
| Area                | 3   | $A$                    | $L_{pix}^2 \cdot N_{pix}$                                                                        |
| Volume              | 4   | $V$                    | $\frac{4}{3}\pi \cdot \left(\frac{L_{minor}}{2}\right)^2 \cdot \left(\frac{L_{major}}{2}\right)$ |
| Circularity         | 5   |                        | $4\pi A/P$                                                                                       |
| Eccentricity        | 6   |                        | $L_{ellip}/L_{major}$                                                                            |
| Aspect Ratio        | 7   |                        | $L_{minor}/L_{major}$                                                                            |
| Orientation         | 8   |                        | $\theta_{major}$                                                                                 |
| Attenuation Density | 9   |                        | $\iint_A (1 - OD(x,y)) dx dy / N_{pix}$                                                          |
| Amplitude Variance  | 10  | $\sigma_{OD}^2$        | $\iint_A (OD(x,y) - \underline{OD})^2 dx dy / (N_{pix} - 1)$                                     |
| Amplitude Skewness  | 11  |                        | $\iint_A (OD(x,y) - \underline{OD})^3 dx dy / (N_{pix} \cdot \sigma_{OD}^3)$                     |
| Amplitude Kurtosis  | 12  |                        | $\iint_A (OD(x,y) - \underline{OD})^4 dx dy / (N_{pix} \cdot \sigma_{OD}^4)$                     |
| Peak Amplitude      | 13  |                        | $\max\{OD(x,y)\}$                                                                                |
| Peak Absorption     | 14  |                        | $\min\{OD(x,y)\}$                                                                                |
| Amplitude Range     | 15  |                        | $\{OD(x,y)\} - \min\{OD(x,y)\}$                                                                  |
| BF Entropy Mean     | 16  | $\underline{OD}_{ent}$ | $\frac{\iint_A OD_{ent}(x,y) dx dy}{N_{pix}}$                                                    |
| BF Entropy Variance | 17  | $\sigma_{ODent}^2$     | $\iint_A (OD_{ent}(x,y) - \underline{OD}_{ent})^2 dx dy / (N_{pix} - 1)$                         |
| BF Entropy Skewness | 18  |                        | $\iint_A (OD_{ent}(x,y) - \underline{OD}_{ent})^3 dx dy / (N_{pix} \cdot \sigma_{ODent}^3)$      |
| BF Entropy Kurtosis | 19  |                        | $\iint_A (OD_{ent}(x,y) - \underline{OD}_{ent})^4 dx dy / (N_{pix} \cdot \sigma_{ODent}^4)$      |



Supplementary information

|                                        |    |                        |                                                                                                 |
|----------------------------------------|----|------------------------|-------------------------------------------------------------------------------------------------|
| BF Entropy Range                       | 20 |                        | $\{OD_{ent}(x,y)\} - \min_{\text{ROI}}\{OD_{ent}(x,y)\}$                                        |
| BF Entropy Peak                        | 21 |                        | $\max_{\text{ROI}}\{OD_{ent}(x,y)\}$                                                            |
| BF Entropy Min                         | 22 |                        | $\min_{\text{ROI}}\{OD_{ent}(x,y)\}$                                                            |
| BF Entropy Centroid Displacement       | 23 |                        | $\sqrt{(x_{ODent,cen} - x_{cen})^2 + (y_{ODent,cen} - y_{cen})^2} \cdot L_{pix}$                |
| BF Entropy Radial Distribution         | 24 |                        | $\frac{\iint_A r \cdot OD_{ent}(r,\theta) drd\theta}{\iint_A OD_{ent}(r,\theta) drd\theta}$     |
| BF STD Mean                            | 25 | $\underline{OD_{STD}}$ | $\frac{\iint_A OD_{STD}(x,y) dxdy}{N_{pix}}$                                                    |
| BF STD Variance                        | 26 | $\sigma_{ODstd}^2$     | $\frac{\iint_A (OD_{STD}(x,y) - \underline{OD_{STD}})^2 dxdy}{N_{pix} - 1}$                     |
| BF STD Skewness                        | 27 |                        | $\frac{\iint_A (OD_{STD}(x,y) - \underline{OD_{STD}})^3 dxdy / N_{pix}}{\sigma_{ODstd}^3}$      |
| BF STD Kurtosis                        | 28 |                        | $\frac{\iint_A (OD_{STD}(x,y) - \underline{OD_{STD}})^4 dxdy / N_{pix}}{\sigma_{ODstd}^4}$      |
| BF STD Range                           | 29 |                        | $\{OD_{STD}(x,y)\} - \min_{\text{ROI}}\{OD_{STD}(x,y)\}$                                        |
| BF STD Peak                            | 30 |                        | $\max_{\text{ROI}}\{OD_{STD}(x,y)\}$                                                            |
| BF STD Min                             | 31 |                        | $\min_{\text{ROI}}\{OD_{STD}(x,y)\}$                                                            |
| BF STD Centroid Displacement           | 32 |                        | $\sqrt{(x_{ODSTD,cen} - x_{cen})^2 + (y_{ODSTD,cen} - y_{cen})^2} \cdot L_{pix}$                |
| BF STD Radial Distribution             | 33 |                        | $\frac{\iint_A r \cdot OD_{STD}(r,\theta) drd\theta}{\iint_A OD_{STD}(r,\theta) drd\theta}$     |
| BF Fiber Texture Centroid Displacement | 34 |                        | $\sqrt{(x_{ODfiber,cen} - x_{cen})^2 + (y_{ODfiber,cen} - y_{cen})^2} \cdot L_{pix}$            |
| BF Fiber Texture Radial Distribution   | 35 |                        | $\frac{\iint_A r \cdot OD_{fiber}(r,\theta) drd\theta}{\iint_A OD_{fiber}(r,\theta) drd\theta}$ |

Supplementary information

|                                               |    |                          |                                                                                                      |
|-----------------------------------------------|----|--------------------------|------------------------------------------------------------------------------------------------------|
| BF Fiber Texture<br>Pixel>Upper<br>Percentile | 36 |                          | $\frac{\text{Number of pixels in } OD_{fiber}(x,y) > 75\text{th percentile}}{N_{pix}}$               |
| BF Fiber Texture<br>Pixel>Median              | 37 |                          | $\frac{\text{Number of pixels in } OD_{fiber}(x,y) > \text{median}}{N_{pix}}$                        |
| BF Fiber Mean                                 | 38 | $\underline{OD}_{fiber}$ | $\frac{\iint_A OD_{fiber}(x,y) dx dy}{N_{pix}}$                                                      |
| BF Fiber Variance                             | 39 | $\sigma_{OD_{fiber}}^2$  | $\frac{\iint_A (OD_{fiber}(x,y) - \underline{OD}_{fiber})^2 dx dy}{N_{pix} - 1}$                     |
| BF Fiber Skewness                             | 40 |                          | $\frac{\iint_A (OD_{fiber}(x,y) - \underline{OD}_{fiber})^3 dx dy / N_{pix}}{\sigma_{OD_{fiber}}^3}$ |
| BF Fiber Kurtosis                             | 41 |                          | $\frac{\iint_A (OD_{fiber}(x,y) - \underline{OD}_{fiber})^4 dx dy / N_{pix}}{\sigma_{OD_{fiber}}^4}$ |
| Dry Mass                                      | 42 | $MD_{total}$             | $\frac{\lambda}{2\pi\alpha} \iint_A MD(x,y) dx dy$                                                   |
| Dry Mass Density                              | 43 | $\underline{DMD}$        | $\iint_A DMD(x,y) dx dy / N_{pix}$                                                                   |
| Dry Mass Variance                             | 44 | $\sigma_{DMD}^2$         | $\iint_A (DMD(x,y) - \underline{DMD})^2 dx dy / (N_{pix} - 1)$                                       |
| Dry Mass Skewness                             | 45 |                          | $\iint_A (DMD(x,y) - \underline{DMD})^3 dx dy / (N_{pix} \cdot \sigma_{DMD}^3)$                      |
| Dry Mass Radial<br>Distribution               | 46 |                          | $\frac{\iint_A DMD(r,\theta) r dr d\theta}{\iint_A DMD(r,\theta) dr d\theta}$                        |
| Dry Mass Centroid<br>Displacement             | 47 |                          | $\sqrt{(x_{DMD,cen} - x_{cen})^2 + (y_{DMD,cen} - y_{cen})^2} \cdot L_{pix}$                         |
| Peak Phase                                    | 48 |                          | $\max_{\{x,y\}} \{MD(x,y)\}$                                                                         |
| Phase Variance                                | 49 | $\sigma_{MD}^2$          | $\iint_A (MD(x,y) - \underline{MD})^2 dx dy / (N_{pix} - 1)$                                         |
| Phase Skewness                                | 50 |                          | $\iint_A (MD(x,y) - \underline{MD})^3 dx dy / (N_{pix} \cdot \sigma_{MD}^3)$                         |
| Phase Kutosis                                 | 51 |                          | $\iint_A (MD(x,y) - \underline{MD})^4 dx dy / (N_{pix} \cdot \sigma_{MD}^4)$                         |
| Phase Range                                   | 52 |                          | $\max \{MD(x,y)\} - \min_{\{x,y\}} \{MD(x,y)\}$                                                      |

Supplementary information

|                                   |    |                        |                                                                                             |
|-----------------------------------|----|------------------------|---------------------------------------------------------------------------------------------|
| Phase Minimum                     | 53 |                        | $\min_{\{MD(x,y)\}}$                                                                        |
| Phase Radial Distribution         | 54 |                        | $\frac{\iint_A r \cdot MD(r,\theta) drd\theta}{\iint_A MD(r,\theta) drd\theta}$             |
| Phase Centroid Displacement       | 55 |                        | $\sqrt{(x_{DMD,cen} - x_{cen})^2 + (y_{DMD,cen} - y_{cen})^2} \cdot L_{pix}$                |
| Phase STD Mean                    | 56 | $\underline{MD_{STD}}$ | $\frac{\iint_A MD_{STD}(x,y) dx dy}{N_{pix}}$                                               |
| Phase STD Var                     | 57 | $\sigma_{MDstd}^2$     | $\frac{\iint_A (MD_{STD}(x,y) - \underline{MD_{STD}})^2 dx dy}{N_{pix} - 1}$                |
| Phase STD Skewness                | 58 |                        | $\frac{\iint_A (MD_{STD}(x,y) - \underline{MD_{STD}})^3 dx dy / N_{pix}}{\sigma_{MDstd}^3}$ |
| Phase STD Kurtosis                | 59 |                        | $\frac{\iint_A (MD_{STD}(x,y) - \underline{MD_{STD}})^4 dx dy / N_{pix}}{\sigma_{MDstd}^4}$ |
| Phase STD Centroid Displacement   | 60 |                        | $\sqrt{(x_{MDSTD,cen} - x_{cen})^2 + (y_{MDSTD,cen} - y_{cen})^2} \cdot L_{pix}$            |
| Phase SRD Radial Distribution     | 61 |                        | $\frac{\iint_A r \cdot MD_{STD}(r,\theta) drd\theta}{\iint_A MD_{STD}(r,\theta) drd\theta}$ |
| Fit Texture Mean                  | 62 | $\underline{MD_{fit}}$ | $\frac{\iint_A MD_{fit}(x,y) dx dy}{N_{pix}}$                                               |
| Fit Texture Variance              | 63 | $\sigma_{MDfit}^2$     | $\frac{\iint_A (MD_{fit}(x,y) - \underline{MD_{fit}})^2 dx dy}{N_{pix} - 1}$                |
| Fit Texture Skewness              | 64 |                        | $\frac{\iint_A (MD_{fit}(x,y) - \underline{MD_{fit}})^3 dx dy / N_{pix}}{\sigma_{MDfit}^3}$ |
| Fit Texture Kurtosis              | 65 |                        | $\frac{\iint_A (MD_{fit}(x,y) - \underline{MD_{fit}})^4 dx dy / N_{pix}}{\sigma_{MDfit}^4}$ |
| Fit Texture Centroid Displacement | 66 |                        | $\sqrt{(x_{MDfit,cen} - x_{cen})^2 + (y_{MDfit,cen} - y_{cen})^2} \cdot L_{pix}$            |

Supplementary information

|                                     |    |                          |                                                                                                  |
|-------------------------------------|----|--------------------------|--------------------------------------------------------------------------------------------------|
| Fit Texture Radial Distribution     | 67 |                          | $\frac{\iint_A r \cdot MD_{fit}(r,\theta) drd\theta}{\iint_A MD_{fit}(r,\theta) drd\theta}$      |
| Phase Entropy Mean                  | 68 | $\underline{MD_{ent}}$   | $\frac{\iint_A MD_{ent}(x,y) dxdy}{N_{pix}}$                                                     |
| Phase Entropy Var                   | 69 | $\sigma_{MDent}^2$       | $\frac{\iint_A (MD_{ent}(x,y) - \underline{MD_{ent}})^2 dxdy}{N_{pix} - 1}$                      |
| Phase Entropy Skewness              | 70 |                          | $\frac{\iint_A (MD_{ent}(x,y) - \underline{MD_{ent}})^3 dxdy / N_{pix}}{\sigma_{MDent}^3}$       |
| Phase Entropy Kurtosis              | 71 |                          | $\frac{\iint_A (MD_{ent}(x,y) - \underline{MD_{ent}})^4 dxdy / N_{pix}}{\sigma_{MDent}^4}$       |
| Phase Entropy Centroid Displacement | 72 |                          | $\sqrt{(x_{MDent,cen} - x_{cen})^2 + (y_{MDent,cen} - y_{cen})^2} \cdot L_{pix}$                 |
| Phase Entropy Radial Distribution   | 73 |                          | $\frac{\iint_A r \cdot MD_{ent}(r,\theta) drd\theta}{\iint_A MD_{ent}(r,\theta) drd\theta}$      |
| Phase Fiber Centroid Displacement   | 74 |                          | $\sqrt{(x_{MDfiber,cen} - x_{cen})^2 + (y_{MDfiber,cen} - y_{cen})^2} \cdot L_{pix}$             |
| Phase Fiber Radial Distribution     | 75 |                          | $\frac{\iint_A r \cdot MD_{fiber}(r,\theta) drd\theta}{\iint_A MD_{fiber}(r,\theta) drd\theta}$  |
| Phase Fiber Pixel>Upper Percentile  | 76 |                          | $\frac{\text{Number of pixels in } MD_{fiber}(x,y) > 75\text{th percentile}}{N_{pix}}$           |
| Phase Fiber Pixel>Median            | 77 |                          | $\frac{\text{Number of pixels in } MD_{fiber}(x,y) > \text{median}}{N_{pix}}$                    |
| Phase Fiber Mean                    | 78 | $\underline{MD_{fiber}}$ | $\frac{\iint_A MD_{fiber}(x,y) dxdy}{N_{pix}}$                                                   |
| Phase Fiber Var                     | 79 | $\sigma_{MDfiber}^2$     | $\frac{\iint_A (MD_{fiber}(x,y) - \underline{MD_{fiber}})^2 dxdy}{N_{pix} - 1}$                  |
| Phase Fiber Skewness                | 80 |                          | $\frac{\iint_A (MD_{fiber}(x,y) - \underline{MD_{fiber}})^3 dxdy / N_{pix}}{\sigma_{MDfiber}^3}$ |

Supplementary information

|                            |    |                    |                                                                                                                           |
|----------------------------|----|--------------------|---------------------------------------------------------------------------------------------------------------------------|
| Phase Fiber Kurtosis       | 81 |                    | $\frac{\iint_A (MD_{fiber}(x,y) - \underline{MD}_{fiber})^4 dx dy / N_{pix}}{\sigma_{MDfiber}^4}$                         |
| Mean Phase Arrangement     | 82 |                    | $\frac{\iint_A MD(r,\theta) r dr d\theta}{\iint_A MD(r,\theta) dr d\theta}$                                               |
| Phase Arrangement Variance | 83 | $\sigma_{MDarr}^2$ | $\frac{\iint_A (MD(r,\theta) r)^2 dr d\theta}{\iint_A MD(r,\theta) dr d\theta}$                                           |
| Phase Arrangement Skewness | 84 |                    | $\frac{\iint_A (MD(r,\theta) \cdot r)^3 dr d\theta}{\sigma_{MDarr}^2 \cdot \iint_A MD(r,\theta) dr d\theta}$              |
| Phase Orientation Variance | 85 | $\sigma_{MDang}^2$ | $\frac{\int_0^\infty (\bar{M}D(\omega) \cdot \omega)^2 d\omega}{\int_0^\infty \bar{M}D(\omega) d\omega}$                  |
| Phase Orientation Kurtosis | 86 |                    | $\frac{\int_0^\infty (MD(\omega) \cdot \omega)^4 d\omega}{\sigma_{MDang}^2 \cdot \int_0^\infty \bar{M}D(\omega) d\omega}$ |

172 Table S7: Variables and abbreviations of single-cell features

| Variable                                                              | Description                                      | Equation/Remarks                                                                                                                           |
|-----------------------------------------------------------------------|--------------------------------------------------|--------------------------------------------------------------------------------------------------------------------------------------------|
| $C$                                                                   | Contour of binary mask                           |                                                                                                                                            |
| CM                                                                    | Cell mask function                               | $CM(x,y) = \{ 1, 0 \text{ if inside cell otherwise}$                                                                                       |
| DMD                                                                   | Dry mas density map                              | $DMD(x,y) = \frac{\lambda \cdot MD(x,y)}{2\pi\alpha \cdot h(x,y)}$                                                                         |
| $h$                                                                   | Cell height map                                  | $h(x,y) = \sqrt{\left(\frac{L_{minor} + L_{major}}{2}\right)^2 - ((x - x_{cen})^2 + (y - y_{cen})^2)}$                                     |
| $L_{ellip}$                                                           | Distance between foci of ellipse                 |                                                                                                                                            |
| $L_{major}$                                                           | Major axis length                                |                                                                                                                                            |
| $L_{minor}$                                                           | Minor axis length                                |                                                                                                                                            |
| $L_{pix}$                                                             | Physical length of one pixel                     |                                                                                                                                            |
| $\square\square$                                                      | Mass density map (QP contrast)                   | $\square\square(\square, \square)$                                                                                                         |
| $MD(\theta)$                                                          | Mass density projected to polar angle            |                                                                                                                                            |
| $MD(\omega)$                                                          | Mass density in angular frequency domain         | $MD(\omega) = F(MD(\theta))$                                                                                                               |
| $MD_{\square\square\square, \square\square\square}(\square, \square)$ | Mean value of QPI within STD filter kernel       | $\frac{\int_{x - \frac{w_{STD}}{2}}^{x + \frac{w_{STD}}{2}} \int_{y - \frac{w_{STD}}{2}}^{y + \frac{w_{STD}}{2}} MD(u,v) dvdu}{w_{STD}^2}$ |
| $MD_{STD}(x,y)$                                                       | QPI STD map                                      | $\int_{x - w_{STD}/2}^{x + w_{STD}/2} \int_{y - w_{STD}/2}^{y + w_{STD}/2} \sqrt{\frac{(MD(u,v) - MD_{STD,ker}(x,y))^2}{w_{STD}^2}} dvdu$  |
| $MD_{cubic}(x,y)$                                                     | Cubic polynomial surface fit of mass density map |                                                                                                                                            |
| $MD_{fit}(x,y)$                                                       | Fit texture map of mass density map              | $MD(x,y) - MD_{cubic}(x,y)$                                                                                                                |
| $MD_{ent}(x,y)$                                                       | Entropy filtered mass density map                | $\sum_{k=0}^{255} p_{MD,k} \cdot p_{MD,k}$                                                                                                 |

## Supplementary information

|                                 |                                                                  |                                                                                                                                                                                |
|---------------------------------|------------------------------------------------------------------|--------------------------------------------------------------------------------------------------------------------------------------------------------------------------------|
| $MD_{fiber}(x,y)$               | Fiber texture enhanced mass density map                          | $FF(MD(x,y))$ [1]                                                                                                                                                              |
| $N_{pix}$                       | Pixel number in cell mask                                        | $\iint CM(x,y) dA$                                                                                                                                                             |
| $OD$                            | Optical density map (BF contrast)                                | $OD(x,y)$                                                                                                                                                                      |
| $\underline{OD}$                | Amplitude mean                                                   | $\iint_A OD(x,y) dx dy / N_{pix}$                                                                                                                                              |
| $OD_{ent}(x,y)$                 | Entropy filtered optical density map                             | $\sum_{k=0}^{255} p_{OD,k} \cdot p_{OD,k}$                                                                                                                                     |
| $\underline{OD}_{STD,ker}(x,y)$ | Mean value of BF within STD filter kernel                        | $\frac{\int_{x-\frac{w_{STD}}{2}}^{x+\frac{w_{STD}}{2}} \int_{y-\frac{w_{STD}}{2}}^{y+\frac{w_{STD}}{2}} OD(u,v) dv du}{w_{STD}^2}$                                            |
| $OD_{STD}(x,y)$                 | BF STD map                                                       | $\int_{x-\frac{w_{STD}}{2}}^{x+\frac{w_{STD}}{2}} \int_{y-\frac{w_{STD}}{2}}^{y+\frac{w_{STD}}{2}} \sqrt{\frac{(OD(u,v) - \underline{OD}_{STD,ker}(x,y))^2}{w_{STD}^2}} dv du$ |
| $OD_{fiber}(x,y)$               | Fiber texture enhanced optical density map                       | $FF(OD(x,y))$ [1]                                                                                                                                                              |
| $P$                             | Perimeter                                                        | $\oint_c \sqrt{\left(\frac{dx}{d\theta}\right)^2 + \left(\frac{dy}{d\theta}\right)^2} d\theta$                                                                                 |
| $p_{MD,k}(x,y)$                 | Normalized histogram counts within kernel of mass density map    | $\frac{\text{number of pixels in kernel } (w_{ent}) \text{ with } MD = k}{\text{Total number of pixels in kernel to 255}}$ , where k = 0 to 255                                |
| $p_{OD,k}(x,y)$                 | Normalized histogram counts within kernel of optical density map | $\frac{\text{number of pixels in kernel } (w_{ent}) \text{ with } OD = k}{\text{Total number of pixels in kernel to 255}}$ , where k = 0 to 255                                |
| $r,\theta$                      | Polar coordinates centered at cell centroid                      |                                                                                                                                                                                |
| $w_{ent}$                       | Kernel size of entropy filter                                    |                                                                                                                                                                                |
| $w_{STD}$                       | Kernel size of STD filter                                        |                                                                                                                                                                                |
| $x,y$                           | Cartesian coordinates                                            |                                                                                                                                                                                |
| $x_{cen}$<br>$y_{cen}$          | Coordinates of cell centroid                                     | $x_{cen} = \iint_A x \cdot CM(x,y) dx dy / N_{pix}$<br>$y_{cen} = \iint_A y \cdot CM(x,y) dx dy / N_{pix}$                                                                     |

## Supplementary information

|                                        |                                                           |                                                                                                                                            |
|----------------------------------------|-----------------------------------------------------------|--------------------------------------------------------------------------------------------------------------------------------------------|
| $x_{MD,cen}$<br>$y_{MD,cen}$           | Coordinates of mass density weighted cell centroid        | $x_{MD,cen} = \iint_A x \cdot MD(x,y) dx dy / N_{pix}$<br>$y_{MD,cen} = \iint_A y \cdot MD(x,y) dx dy / N_{pix}$                           |
| $x_{DMD,cen}$<br>$y_{DMD,cen}$         | Coordinates of dry mass density weighted cell centroid    | $x_{DMD,cen} = \iint_A x \cdot DMD(x,y) dx dy / N_{pix}$<br>$y_{DMD,cen} = \iint_A y \cdot DMD(x,y) dx dy / N_{pix}$                       |
| $x_{MDent,cen}$<br>$y_{MDent,cen}$     | Coordinates of entropy filtered MD weighted cell centroid | $x_{MDent,cen} = \iint_A x \cdot MD_{ent}(x,y) dx dy / N_{pix}$<br>$y_{MDent,cen} = \iint_A y \cdot MD_{ent}(x,y) dx dy / N_{pix}$         |
| $x_{MDfiber,cen}$<br>$y_{MDfiber,cen}$ | Coordinates of fiber enhanced MD weighted cell centroid   | $x_{MDfiber,cen} = \iint_A x \cdot MD_{fiber}(x,y) dx dy / N_{pix}$<br>$y_{MDfiber,cen} = \iint_A y \cdot MD_{fiber}(x,y) dx dy / N_{pix}$ |
| $x_{MDfit,cen}$<br>$y_{MDfit,cen}$     | Coordinates of MD fit texture weighted cell centroid      | $x_{MDfit,cen} = \iint_A x \cdot MD_{fit}(x,y) dx dy / N_{pix}$<br>$y_{MDfit,cen} = \iint_A y \cdot MD_{fit}(x,y) dx dy / N_{pix}$         |
| $x_{MDSTD,cen}$<br>$y_{MDSTD,cen}$     | Coordinates of STD filtered MD weighted cell centroid     | $x_{MDSTD,cen} = \iint_A x \cdot MD_{STD}(x,y) dx dy / N_{pix}$<br>$y_{MDSTD,cen} = \iint_A y \cdot MD_{STD}(x,y) dx dy / N_{pix}$         |
| $x_{ODent,cen}$<br>$y_{ODent,cen}$     | Coordinates of entropy filtered OD weighted cell centroid | $x_{ODent,cen} = \iint_A x \cdot OD_{ent}(x,y) dx dy / N_{pix}$<br>$y_{ODent,cen} = \iint_A y \cdot OD_{ent}(x,y) dx dy / N_{pix}$         |
| $x_{ODfiber,cen}$<br>$y_{ODfiber,cen}$ | Coordinates of fiber enhanced OD weighted cell centroid   | $x_{ODfiber,cen} = \iint_A x \cdot OD_{fiber}(x,y) dx dy / N_{pix}$<br>$y_{ODfiber,cen} = \iint_A y \cdot OD_{fiber}(x,y) dx dy / N_{pix}$ |
| $x_{ODSTD,cen}$<br>$y_{ODSTD,cen}$     | Coordinates of STD filtered OD weighted cell centroid     | $x_{ODSTD,cen} = \iint_A x \cdot OD_{STD}(x,y) dx dy / N_{pix}$<br>$y_{ODSTD,cen} = \iint_A y \cdot OD_{STD}(x,y) dx dy / N_{pix}$         |
| $\alpha$                               | Specific refractive increment                             | 0.19 ml/g [2]                                                                                                                              |
| $\theta_{major}$                       | Angle between major axis and x-axis                       |                                                                                                                                            |
| $F$                                    | Fourier transform                                         |                                                                                                                                            |



Supplementary information

174 **Video S1: Evolution of cross-section particle distribution in HAR rectangular channel**

175

176 **Video S2: Evolution of cross-section particle distribution in HAR symmetric orifice**  
177 **channel**

178

179 **Video S3: Evolution of cross-section particle distribution in DIF system (HAR**  
180 **symmetric orifice channel then HAR rectangular channel)**

181

182 **Video S4: Evolution of cross-section particle distribution in reversed DIF system (HAR**  
183 **rectangular channel then HAR symmetric orifice channel)**

184

185 For Video S1, S3, and S4, due to the significant size-dependency of inertial focusing, the time  
186 to focus particles of different sizes could vary more than 100 times. To better visualize the size-  
187 dependency of inertial focusing in a single and short video, we applied different video play  
188 speeds and color codes for each particle size and simultaneously played them.

| <b>Particle size (<math>\mu\text{m}</math>)</b> | 5    | 10     | 15    | 20   | 25     |
|-------------------------------------------------|------|--------|-------|------|--------|
| <b>Color code</b>                               | Red  | Orange | Green | Blue | Violet |
| <b>Play speed</b>                               | 125x | 64x    | 27x   | 8x   | 1x     |

189

190 **Reference (Supplementary)**

191 [1] H. Zhao, P. H. Brown, P. Schuck, *Biophys J* **2011**, *100*, 2309.

192 [2] A. F. Frangi, W. J. Niessen, K. L. Vincken, M. A. Viergever, in *Medical Image*  
193 *Computing and Computer-Assisted Intervention—MICCAI'98: First International*  
194 *Conference Cambridge, MA, USA, October 11–13, 1998 Proceedings 1*, Springer, **1998**,  
195 pp. 130–137.

196
